# Supplementary material for: Design and synthesis of an environment-sensitive 3-methyleneisoindolin-1-one fluorophore for labeling DNA-interacting proteins
Source: Royal Society of Chemistry journal article supplement (doi:10.1039/d4ob01036a), 2024-01-01
Supplement: d4ob01036a1.pdf [file d4ob01036a1.pdf]

## Supporting Information

Design and synthesis of an environment-sensitive 3-methylneisindoloin-1-one fluorophore for labeling of DNA-interacting protein

Mariko Aso, Chiyo Ohta, Yixuan Liu, Kaori Sasaki-Tabata, Yukiko Abe-Sadamatsu, Chiemi Gatanaga, Yichun Wang, Yang Pei, Guosheng Gao, Tsutomu Katayama, Yosuke Taniguchi and Shigeki Sasaki

### the contents

|                                                                                                                                                                                                                                                |          |
|------------------------------------------------------------------------------------------------------------------------------------------------------------------------------------------------------------------------------------------------|----------|
| General Information                                                                                                                                                                                                                            | S1       |
| Calculation of relative fluorescent quantum yields of <b>7</b> and <b>4b</b>                                                                                                                                                                   | S1       |
| <sup>1</sup> H and <sup>13</sup> C NMR spectra ( <b>8</b> , <b>7</b> , <b>4b</b> , <b>11</b> , <b>12</b> , <b>14</b> , <b>10</b> , <b>18</b> , <b>17</b> , <b>19</b> ),<br>NOESY spectrum of <b>13</b> , and <sup>31</sup> P NMR ( <b>19</b> ) | S2-S18   |
| MALDI-TOF MS spectra of <b>16</b> , <b>22</b> , and <b>20</b>                                                                                                                                                                                  | S18, S19 |
| Figs. S1, S2                                                                                                                                                                                                                                   | S20, S21 |
| Tables S1, S2                                                                                                                                                                                                                                  | S22      |

## General Information

NMR spectra were measured on a Bruker Advance or a Varian UNITY at 300 K. Chemical shifts ( $\delta$ ) are referenced to residual proton in the deuterated solvent. UV-Vis spectra were measured on a SHIMADZU UV-2450 spectrometer. Fluorescent spectra were measured on a JASCO FP-6300. ESI-MS analysis was carried out on a Bruker micrOTOF spectrometer. MALDI-TOF MS analysis was carried out on a Bruker AutoFlexIII and JEOL JMS-S3000. Fluorescence analysis of the gel by SDS-PAGE was performed by using Amersham ImageQuant 800.

### Calculation of relative fluorescent quantum yields of 7 and 4b.

Relative fluorescent quantum yields of compounds were obtained from comparison with quinine sulfate ( $\phi$  0.51  $\lambda_{\text{ex}} = 347.5$  nm in 0.05 M H<sub>2</sub>SO<sub>4</sub>)<sup>1,2</sup> according to the equation below<sup>3</sup>

$$\phi_x = \phi_{st} \times \left(\frac{A_{st}}{A_x}\right) \times \left(\frac{F_x}{F_{st}}\right) \times \left(\frac{n_x}{n_{st}}\right)^2$$

x = sample, st = quinine sulfate;

$\phi$  : relative fluorescent quantum yield

$A$  : absorption of the sample at excited wavelength

$F$  : Integrated fluorescence intensity

$n$  : refractive index of solvent

## References

- 1) N, Takahashi, S. Saito, H. Hoshino, *Bunseki Kagaku*, 2003, **52**, 713-718.
- 2) J. N. Demas and G. A. Crosby, *J. Phys. Chem.*, 1071, **75**, 991-1023.
- 3) J. R. Lakowicz, (2006) *Principles of Fluorescence Spectroscopy*, 3rd ed., Springer.

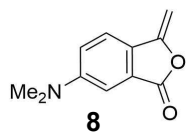

PULPROG - zg30  
 TD 65536  
 SOLVENT CDCl3  
 NS 1  
 DS 0  
 SWH 8012.820 Hz  
 FIDRES 0.244532 Hz  
 AQ 4.0894465 sec  
 RG 31.29  
 DW 62.400 usec  
 DE 10.00 usec  
 TE 300.0 K  
 D1 1.00000000 sec  
 TD0 1  
 SFO1 500.1730010 MHz  
 NUC1 1H  
 P0 4.00 usec  
 P1 12.00 usec  
 PLW1 13.50000000 W

F2 - Processing parameters  
 SI 65536  
 SF 500.1700136 MHz  
 WDW EM  
 SSB 0  
 LB 0.30 Hz  
 GB 0  
 PC 1.00

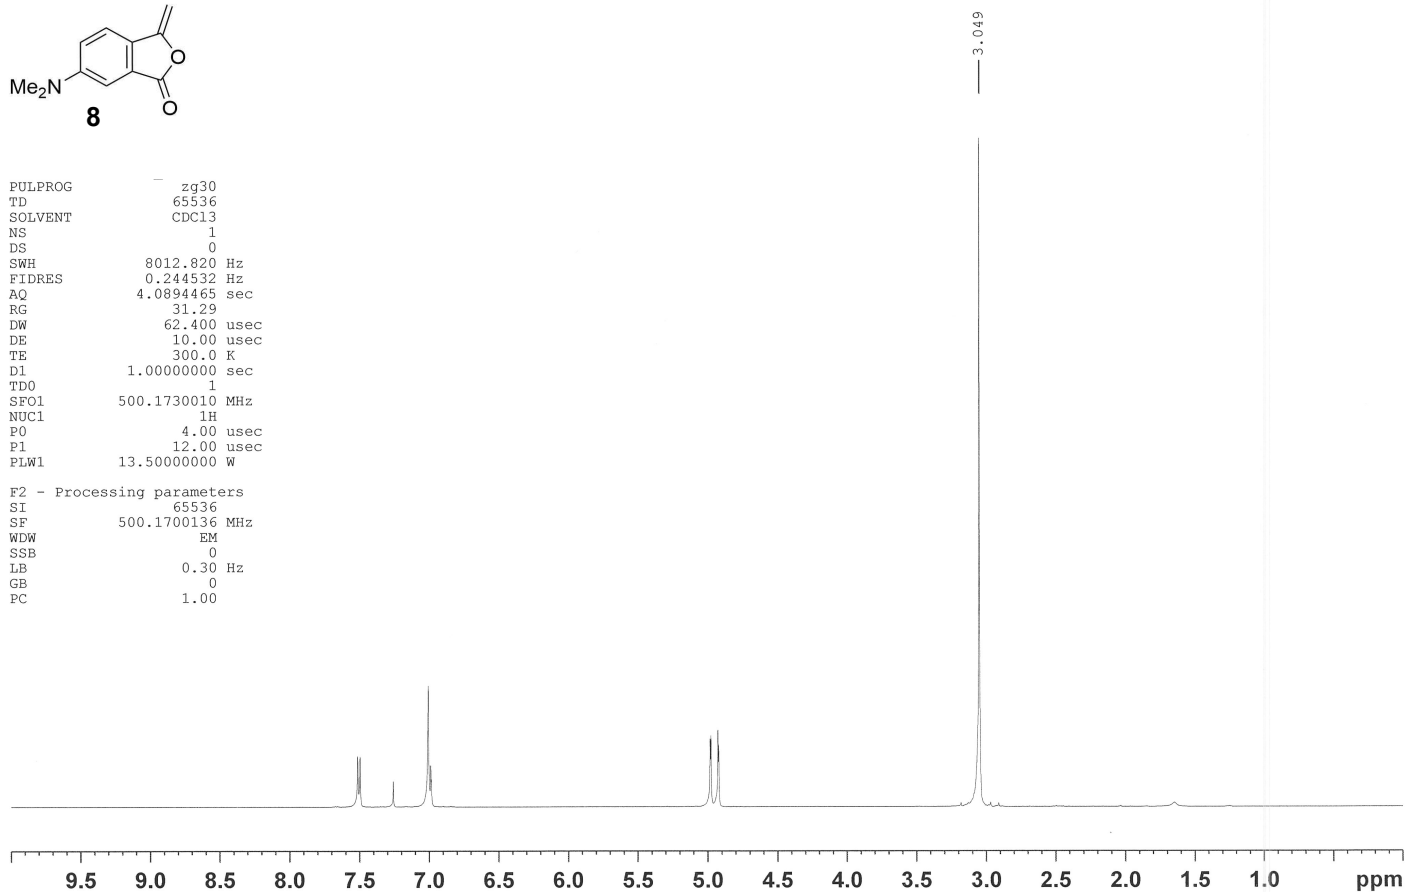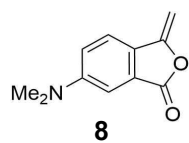

168.101  
 152.466  
 152.073  
 126.795  
 121.541  
 118.704  
 105.741  
 87.360  
 40.616

PROBHD Z130033\_0007 (  
 PULPROG zgpg30  
 TD 65536  
 SOLVENT CDCl3  
 NS 57  
 DS 0  
 SWH 29761.904 Hz  
 FIDRES 0.908261 Hz  
 AQ 1.1010048 sec  
 RG 107.18  
 DW 16.800 usec  
 DE 11.00 usec  
 TE 300.0 K  
 D1 1.89900005 sec  
 D11 0.03000000 sec  
 TD0 1  
 SFO1 125.7804233 MHz  
 NUC1 13C  
 P0 3.33 usec  
 P1 10.00 usec  
 PLW1 65.00000000 W  
 SFO2 500.1720007 MHz  
 NUC2 1H  
 CPDPRG[2] waltz16  
 PCPD2 80.00 usec  
 PLW2 13.50000000 W  
 PLW12 0.30375001 W  
 PLW13 0.15278000 W

F2 - Processing parameters  
 SI 32768  
 SF 125.7678334 MHz  
 WDW EM  
 SSB 0  
 LB 1.00 Hz  
 GB 0  
 PC 1.40

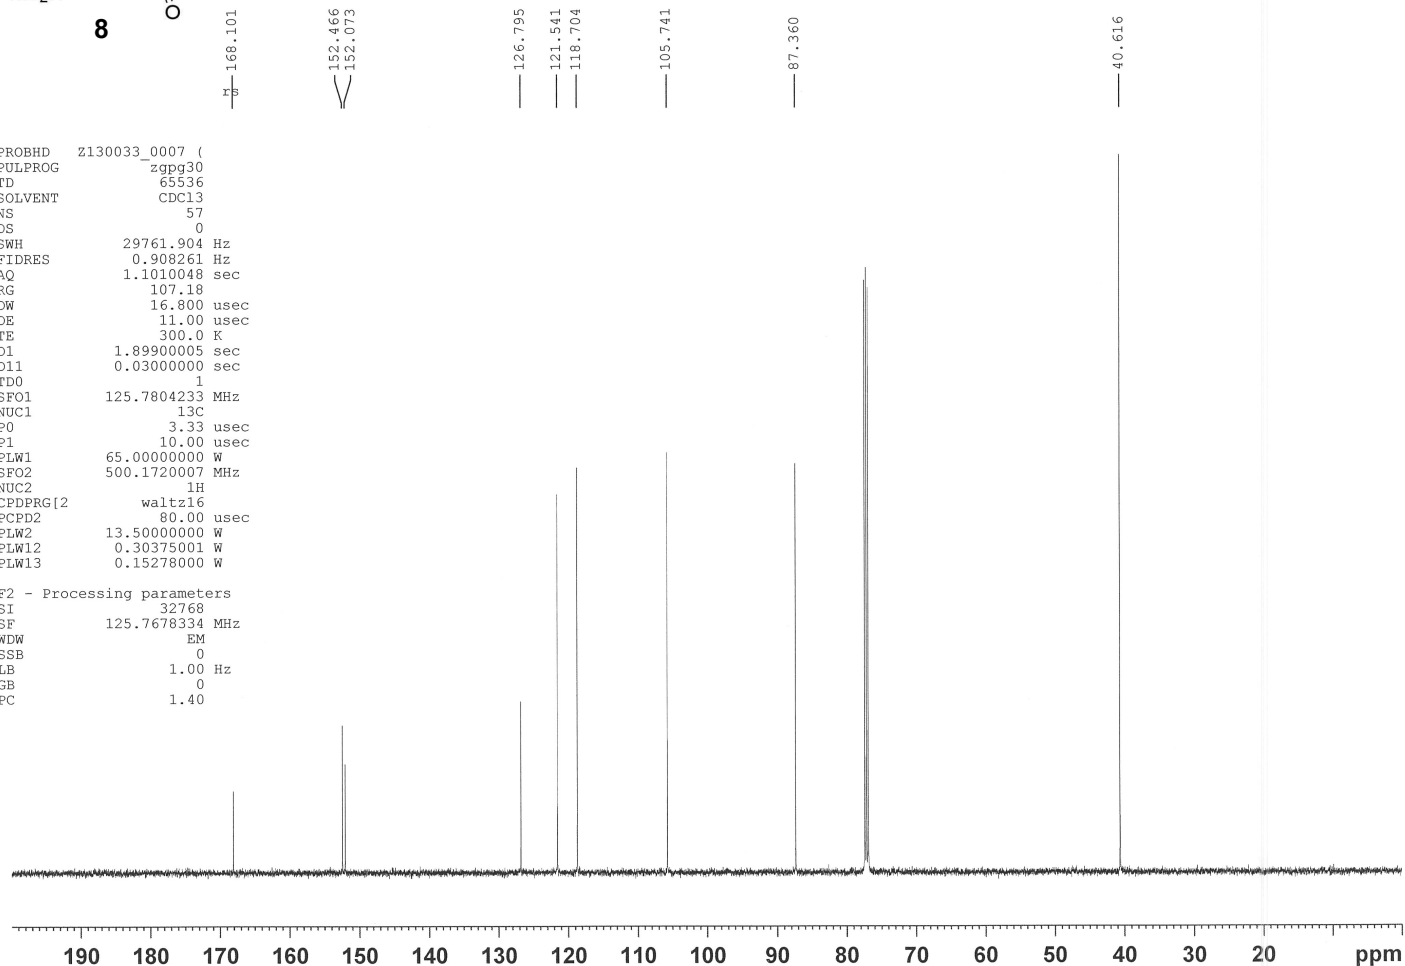

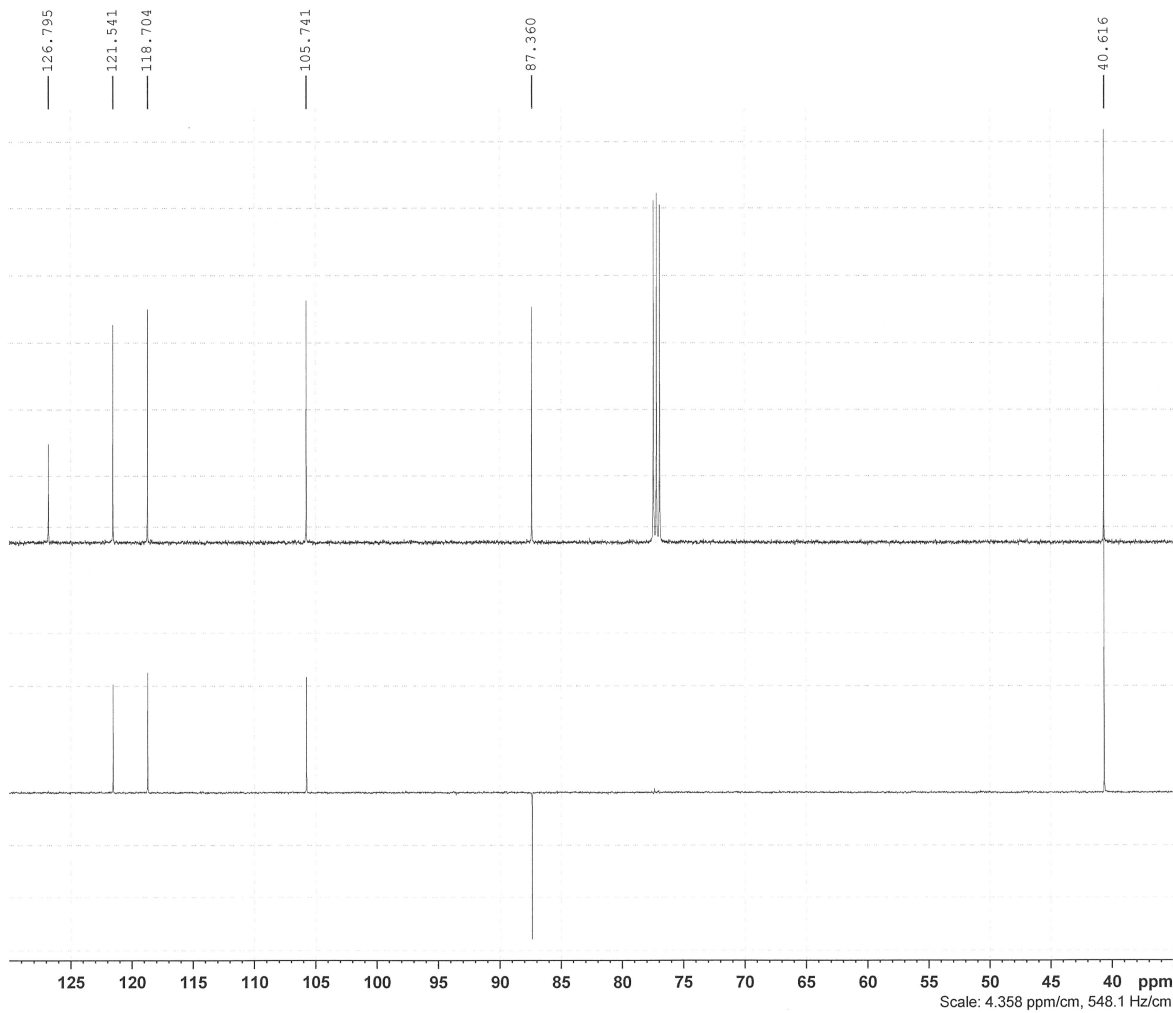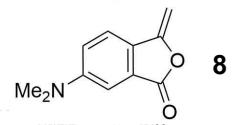

```

SOLVENT  CDCl3
NS        0
DS        29761.904 Hz
SWH       0.908261 Hz
AQ        1.1010048 sec
RG        107.18
DW        16.800 usec
DE        11.00 usec
TE        300.0 K
DI        1.89900000 sec
D1        0.03000000 sec
TPO1     1
SF01     125.7604233 MHz
NUC1     13C
P0       3.33 usec
P1       10.00 usec
PLW1     65.00000000 W
SF02     500.1720007 MHz
NUC2     1H
CPDPRG12 wait16
PCPD2    80.00 usec
PLW2     13.50000000 W
PLW12    0.30375001 W
PLW13    0.15278000 W
  
```

```

F2 - Processing parameters
SI        32768
SF        125.7678334 MHz
WDW       EM
SSB       0
LB        1.00 Hz
GB        0
PC        1.40

Current Data Parameters
NAME     c034
EXPNO    1
PROCNO   1

F2 - Acquisition Parameters
Date_    20200806
Time     10.43 h
INSTRUM  spect
PROBHD   zgpg31
PULPROG  zgpg13
TD        65536
SOLVENT  CDCl3
NS        50
DS        0
SWH       29761.904 Hz
FIDRES    0.908261 Hz
AQ        1.1010048 sec
RG        107.18
DW        16.800 usec
DE        11.00 usec
TE        300.0 K
DI        1.89900000 sec
D1        0.03000000 sec
TPO1     1
SF01     125.7604233 MHz
NUC1     13C
P0       3.33 usec
P1       10.00 usec
PLW1     65.00000000 W
SF02     500.1720007 MHz
NUC2     1H
CPDPRG12 wait16
PCPD2    80.00 usec
PLW2     13.50000000 W
PLW12    0.30375001 W
PLW13    0.15278000 W
  
```

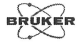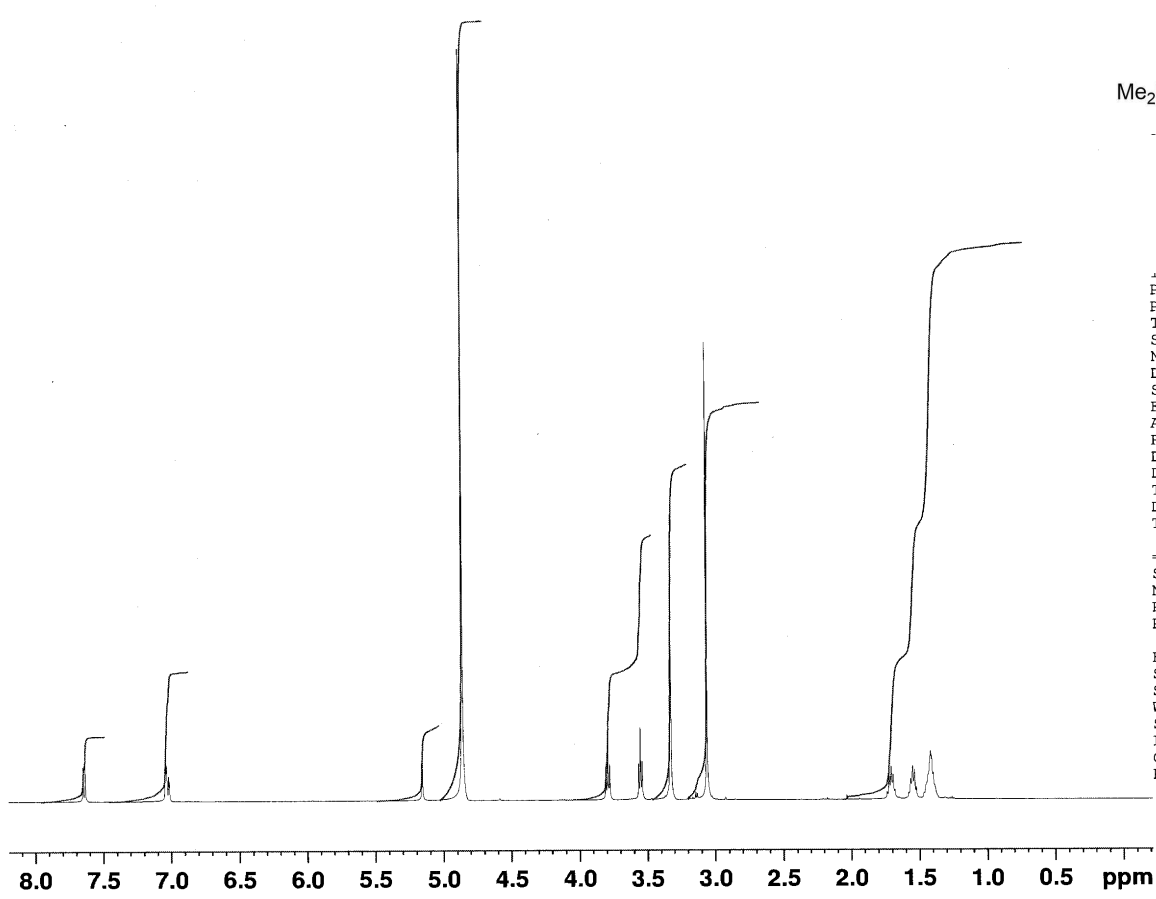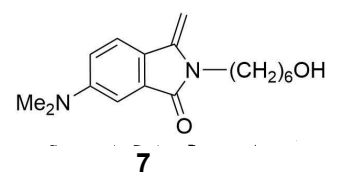

```

INSTRUM  spect
PROBHD   5 mm CPPBBO BE
PULPROG  zg30
TD        65536
SOLVENT  MeOD
NS        16
DS        2
SWH       10000.000 Hz
FIDRES    0.152588 Hz
AQ        3.2767999 sec
RG        31.29
DW        50.000 usec
DE        10.00 usec
TE        300.1 K
DI        1.00000000 sec
TDO       1

===== CHANNEL f1 =====
SF01     500.1730888 MHz
NUC1     1H
P1       12.00 usec
PLW1     13.50000000 W

F2 - Processing parameters
SI        65536
SF        500.1700000 MHz
WDW       EM
SSB       0
LB        0.30 Hz
GB        0
PC        1.00
  
```



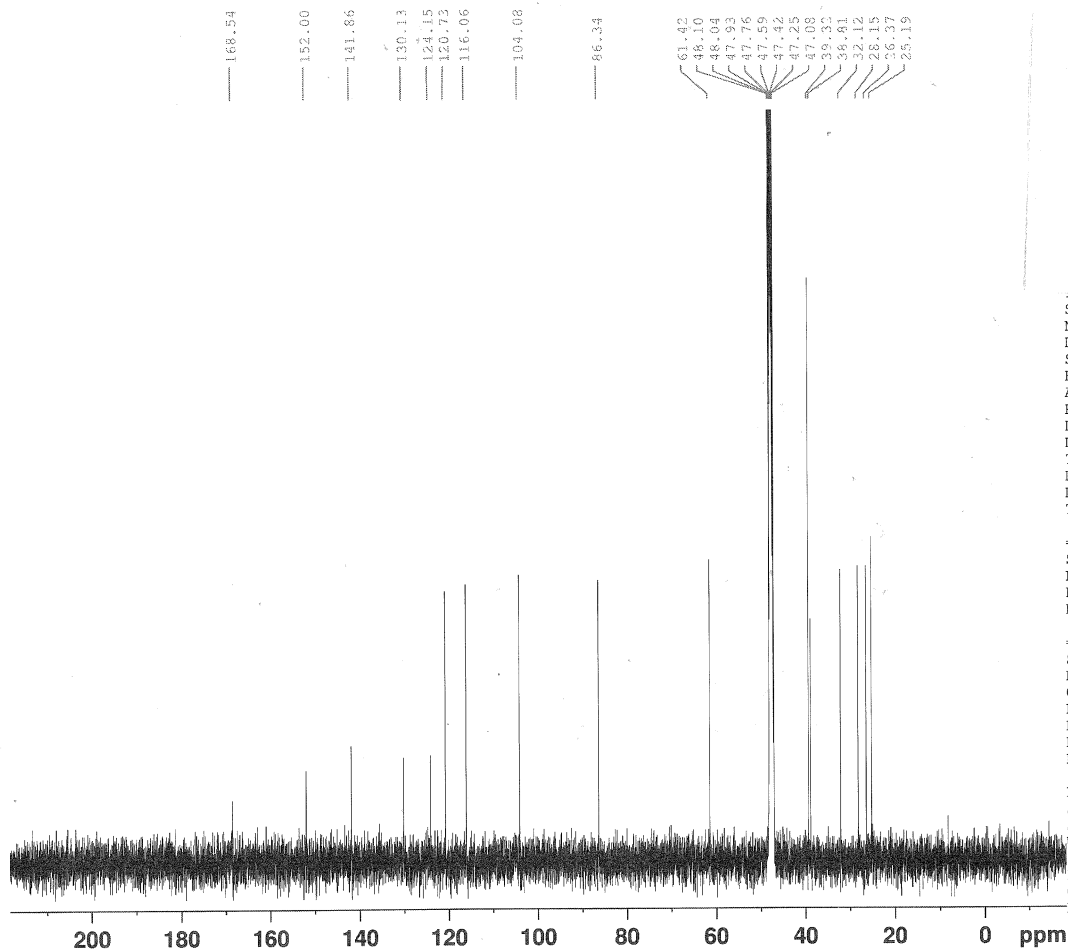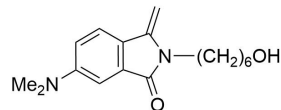

7

```

SOLVENT      MeOD
NS           129
DS           4
SWH          29761.904 Hz
FIDRES       0.454131 Hz
AQ           1.1010048 sec
RG           189.66
DW           16.800 usec
DE           11.00 usec
TE           300.1 K
D1           2.00000000 sec
D11          0.03000000 sec
TD0         1
  
```

```

===== CHANNEL f1 =====
SFO1         125.7804227 MHz
NUC1         13C
P1           10.00 usec
PLW1         65.00000000 W
  
```

```

===== CHANNEL f2 =====
SFO2         500.1720007 MHz
NUC2         1H
CPDPRG[2]   waltz16
PCPD2        80.00 usec
PLW2         13.50000000 W
PLW12        0.30375001 W
PLW13        0.19440000 W
  
```

```

F2 - Processing parameters
SI           32768
SF           125.7678470 MHz
WDW          EM
SSB          0
LB           1.00 Hz
GB           0
PC           1.40
  
```

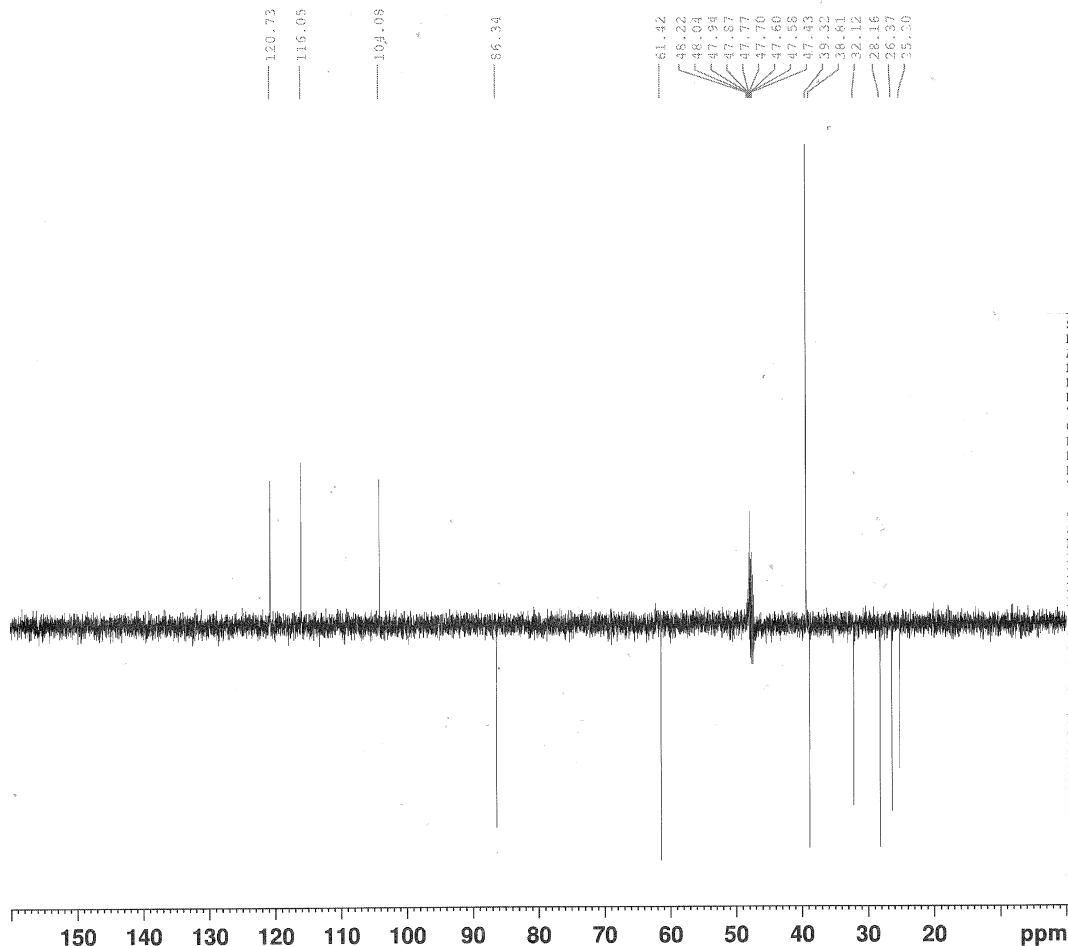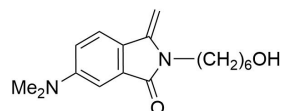

7

```

SWH          20161.291 Hz
FIDRES       0.307637 Hz
AQ           1.6252928 sec
RG           189.66
DW           24.800 usec
DE           11.00 usec
TE           300.2 K
CNST2        145.0000000
D1           2.00000000 sec
D2           0.00344828 sec
D12          0.00002000 sec
TD0         1
  
```

```

===== CHANNEL f1 =====
SFO1         125.7779074 MHz
NUC1         13C
P1           10.00 usec
P13          2000.00 usec
PLW0         0 W
PLW1         65.00000000 W
SPNAM[5]    Crp60comp.4
SPOALS       0.500
SPOFFS5     0 Hz
SPW5         9.93130016 W
  
```

```

===== CHANNEL f2 =====
SFO2         500.1715996 MHz
NUC2         1H
CPDPRG[2]   waltz16
P3           12.00 usec
P4           24.00 usec
PCPD2        80.00 usec
PLW2         13.50000000 W
PLW12        0.30375001 W
  
```

```

F2 - Processing parameters
SI           32768
SF           125.7678470 MHz
WDW          EM
SSB          0
LB           1.00 Hz
GB           0
PC           1.40
  
```

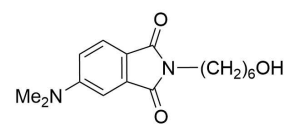

4b

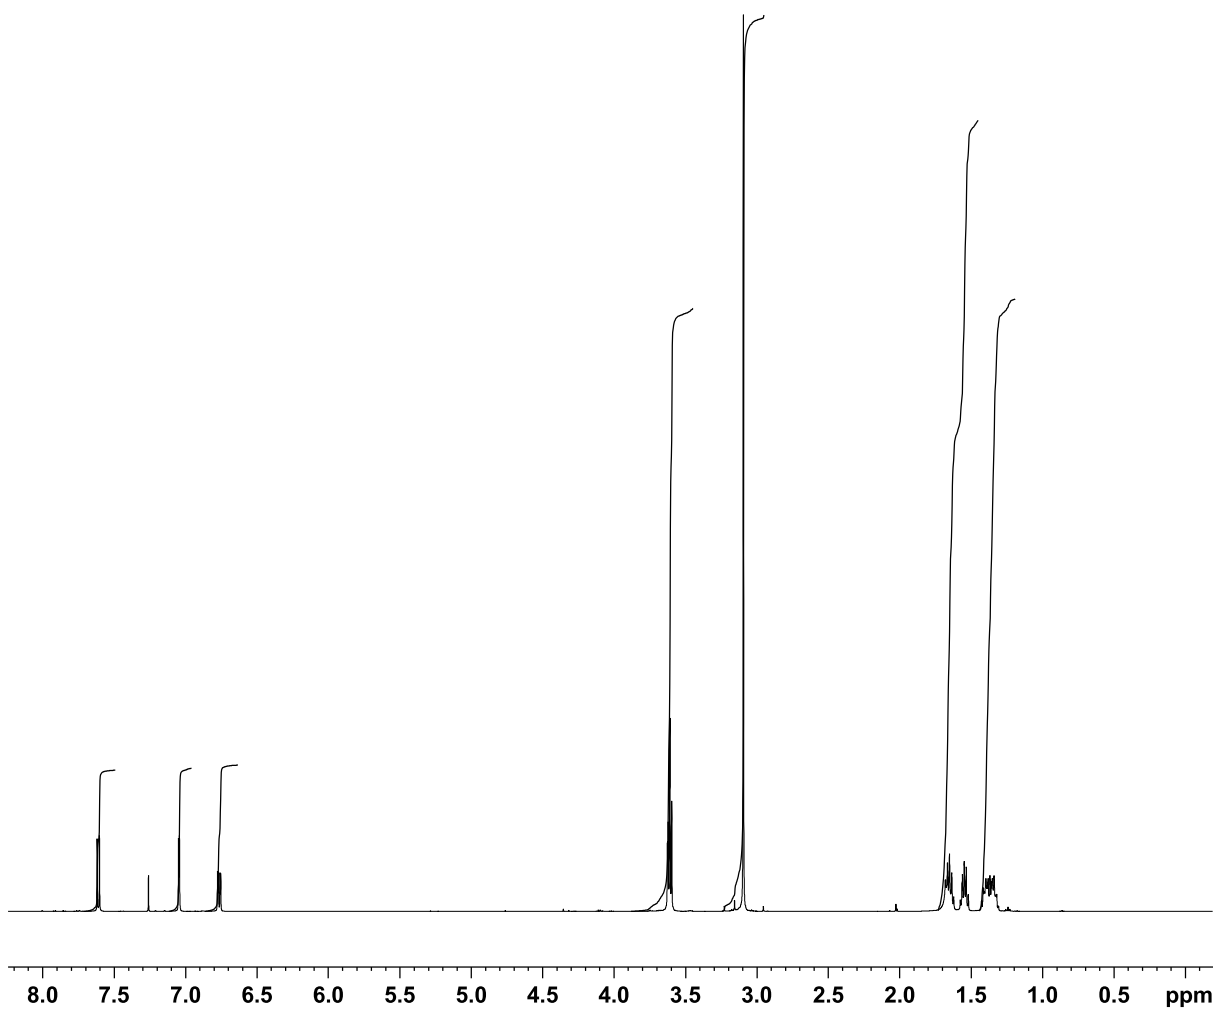

Current Data Parameters  
 NAME phta Nm2  
 EXPNO 10  
 PROCNO 1  
 F2 - Acquisition Parameters  
 Date\_ 20231204  
 Time 22.04 h  
 INSTRUM spect  
 PROBHD Z130033\_0007 ( )  
 PULPROG zg30  
 TD 65536  
 SOLVENT CDCl3  
 NS 16  
 DS 2  
 SWH 10000.000 Hz  
 FIDRES 0.305176 Hz  
 AQ 3.2767999 sec  
 RG 31.29  
 DW 50.000 usec  
 DE 13.55 usec  
 TE 300.0 K  
 D1 1.0000000 sec  
 TD0 1  
 SFO1 500.1730885 MHz  
 NUC1 1H  
 P0 4.00 usec  
 P1 12.00 usec  
 PLW 16.0000000 W  
 F2 - Processing parameters  
 SI 65536  
 SF 500.1700121 MHz  
 WDW EM  
 SSB 0  
 LB 0.30 Hz

169.43  
169.07  
154.38  
134.86  
124.77  
117.81  
114.61  
105.79

62.79  
40.58  
37.63  
32.67  
28.76  
26.55  
25.27

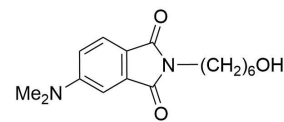

4b

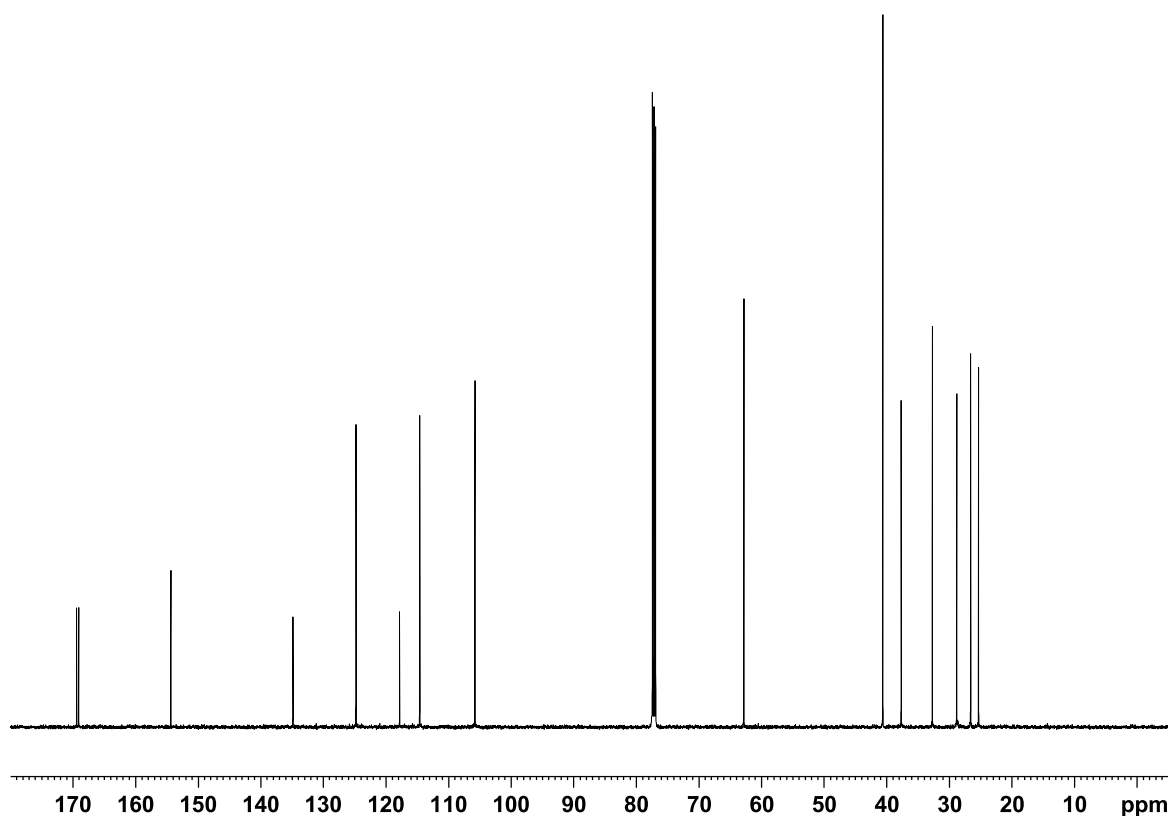

Current Data Parameters  
 NAME phta Nm2  
 EXPNO 11  
 PROCNO 1  
 F2 - Acquisition Parameters  
 Date\_ 20231204  
 Time 22.19 h  
 INSTRUM spect  
 PROBHD Z130033\_0007 ( )  
 PULPROG zgpg30  
 TD 65536  
 SOLVENT CDCl3  
 NS 256  
 DS 4  
 SWH 29761.904 Hz  
 FIDRES 0.908261 Hz  
 AQ 1.1010048 sec  
 RG 189.66  
 DW 16.800 usec  
 DE 11.00 usec  
 TE 300.0 K  
 D1 2.0000000 sec  
 D11 0.0300000 sec  
 TD0 1  
 SFO1 125.7804233 MHz  
 NUC1 13C  
 P0 3.33 usec  
 P1 10.00 usec  
 PLW 70.0000000 W  
 SFO2 500.1720007 MHz  
 NUC2 1H  
 CPDPRG2 waltz65  
 PCPD2 80.00 usec  
 PLW2 16.0000000 W  
 PLW3 0.3600001 W  
 PLW4 0.1810800 W  
 F2 - Processing parameters  
 SI 32768  
 SF 125.7678345 MHz  
 WDW EM

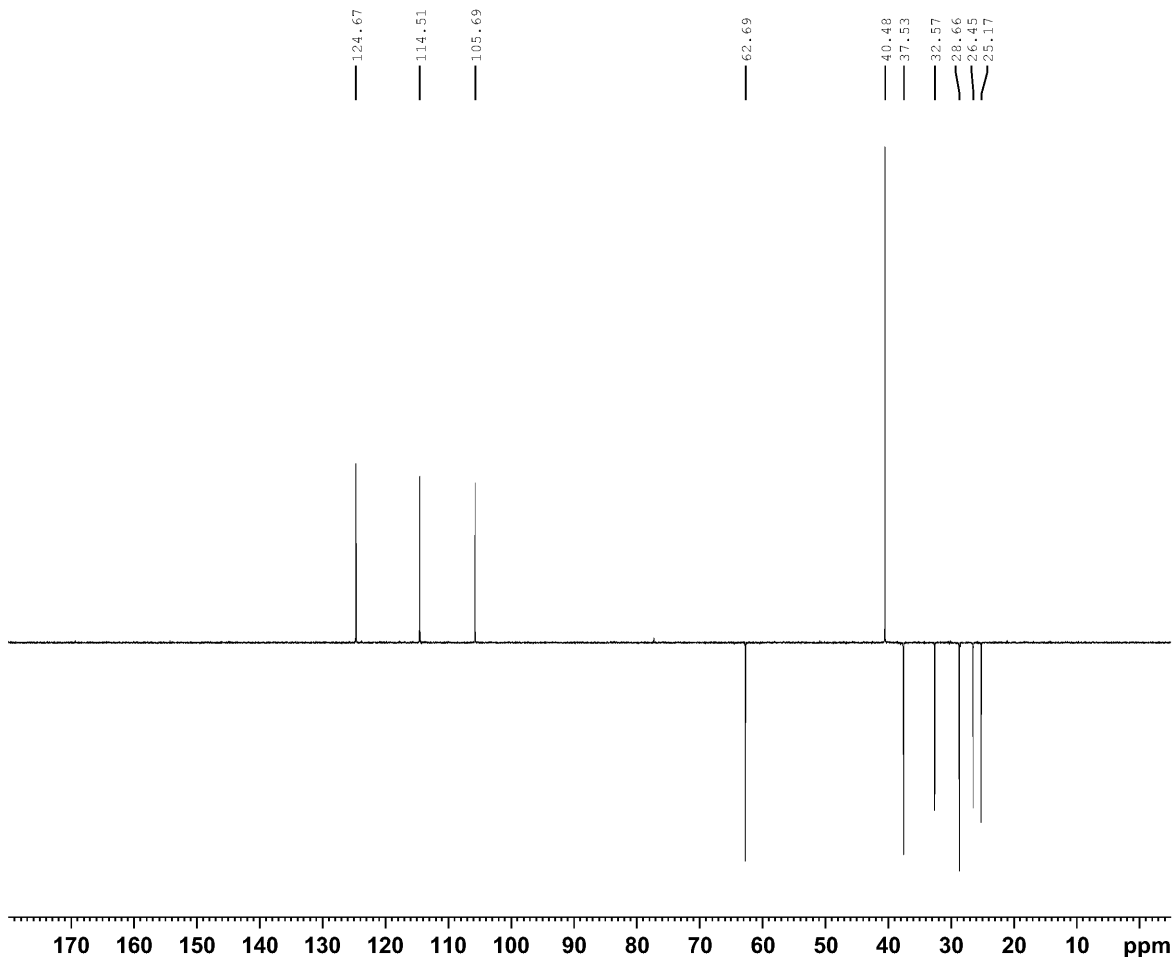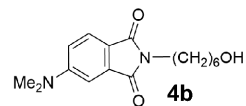

```

INSTRUM      spect
PROBHD       Z130033_0007 (
PULPROG      dept sp135
TD           65536
SOLVENT      CDCl3
NS           200
DS           8
SWH          29761.904 Hz
FIDRES       0.908261 Hz
AQ           1.1010048 sec
RG           189.66
DW           16.800 usec
DE           11.00 usec
TE           300.0 K
CNST2        145.0000000
D1           2.00000000 sec
D2           0.00344828 sec
D12          0.00002000 sec
TD0          1
SFO1         125.7779080 MHz
NUC1         13C
P1           10.00 usec
P13         2000.00 usec
PLW0         0 W
PLW1         70.0000000 W
SPNAM[ 5]    Crp60comp. 4
SPOCAL5      0.500
SPOFFS5      0 Hz
SPW5         10.69499969 W
SFO2         500.1720007 MHz
NUC2         1H
CPDPRQ[ 2]   wal tz65
P3           12.00 usec
P4           24.00 usec
PCPD2        80.00 usec
PLW2         16.0000000 W
PLW2         0.36000001 W
F2 - Processi ng parameters
SI           32768
SF           125.7678470 MHz
WDW          EM
SSB          0
LB           1.00 Hz
GB           0
PC           1.40
  
```

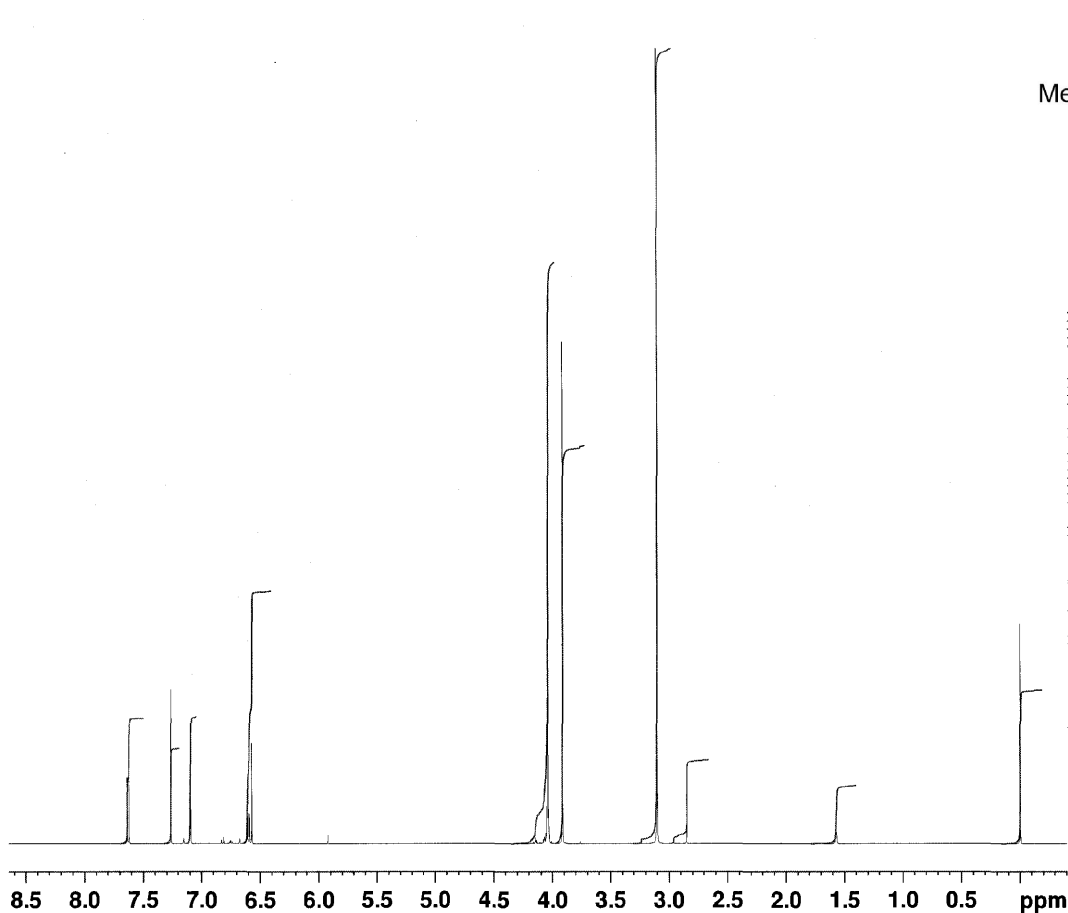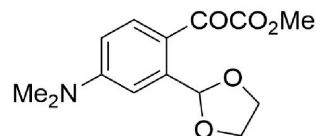

```

-----
INSTRUM      spect
PROBHD       5 mm CPPBBO BB
PULPROG      zg30
TD           65536
SOLVENT      CDCl3
NS           16
DS           2
SWH          10000.000 Hz
FIDRES       0.152588 Hz
AQ           3.2767999 sec
RG           31.29
DW           50.000 usec
DE           10.00 usec
TE           300.1 K
D1           1.00000000 sec
TD0          1
===== CHANNEL f1 =====
SFO1         500.1730888 MHz
NUC1         1H
P1           12.00 usec
PLW1         13.50000000 W
F2 - Processing parameters
SI           65536
SF           500.1700113 MHz
WDW          EM
SSB          0
LB           0.30 Hz
GB           0
PC           1.00
  
```

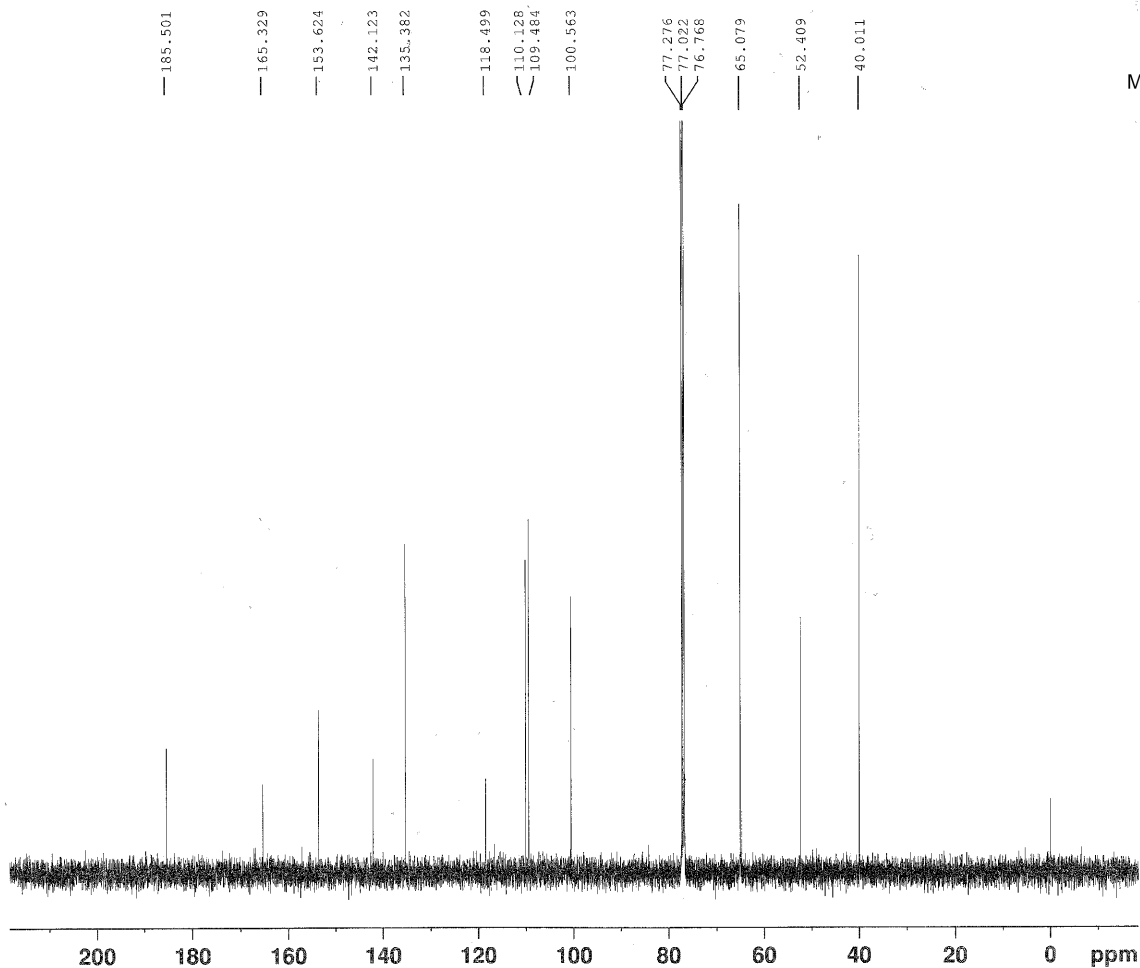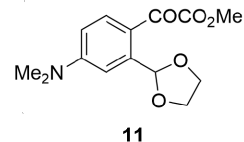

```

FIDRES      0.454131 Hz
AQ          1.1010048 sec
RG          107.18
DW          16.800 usec
DE          11.00 usec
TE          300.1 K
D1          2.00000000 sec
D11         0.03000000 sec
TD0         1
  
```

```

===== CHANNEL f1 =====
SFO1       125.7804227 MHz
NUC1       13C
P1         10.00 usec
PLW1       65.00000000 W
  
```

```

===== CHANNEL f2 =====
SFO2       500.1720007 MHz
NUC2       1H
CPDPRG[2]  waltz16
PCPD2      80.00 usec
PLW2       13.50000000 W
PLW12      0.30375001 W
PLW13      0.19440000 W
  
```

```

F2 - Processing parameters
SI         32768
SF         125.7678470 MHz
WDW        EM
SSB        0
LB         1.00 Hz
GB         0
PC         1.40
  
```

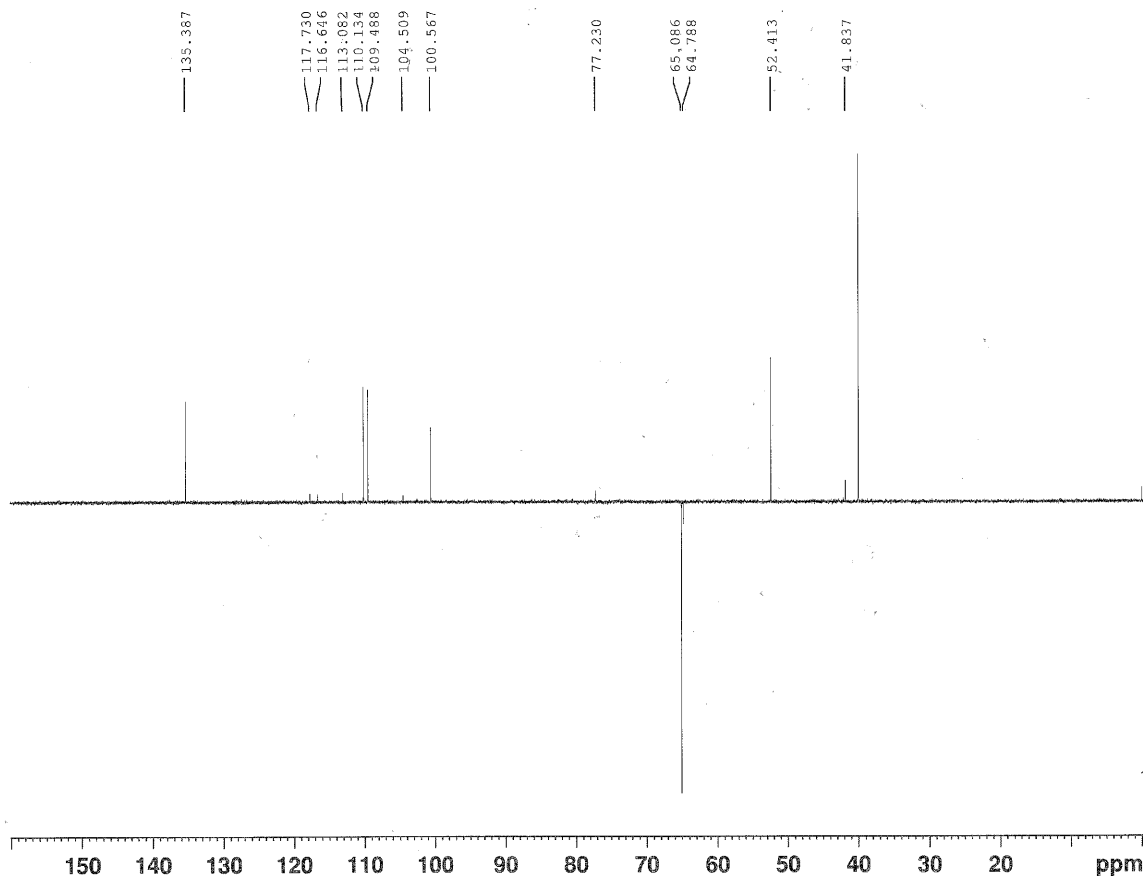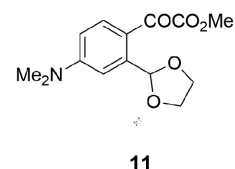

```

DE          11.00 usec
TE          300.2 K
CNST2      145.0000000
D1          2.00000000 sec
D2          0.00344828 sec
D12        0.00002000 sec
TD0         1
  
```

```

===== CHANNEL f1 =====
SFO1       125.7779074 MHz
NUC1       13C
P1         10.00 usec
P13        2000.00 usec
PLW0       0 W
PLW1       65.00000000 W
SPNAM[5]   Crp60comp.4
SFOALS5    0.500
SPOFFS5    0 Hz
SPW5       9.93130016 W
  
```

```

===== CHANNEL f2 =====
SFO2       500.1715996 MHz
NUC2       1H
CPDPRG[2]  waltz16
P3         12.00 usec
P4         24.00 usec
PCPD2      80.00 usec
PLW2       13.50000000 W
PLW12      0.30375001 W
  
```

```

F2 - Processing parameters
SI         32768
SF         125.7678466 MHz
WDW        EM
SSB        0
LB         1.00 Hz
GB         0
PC         1.40
  
```

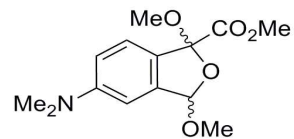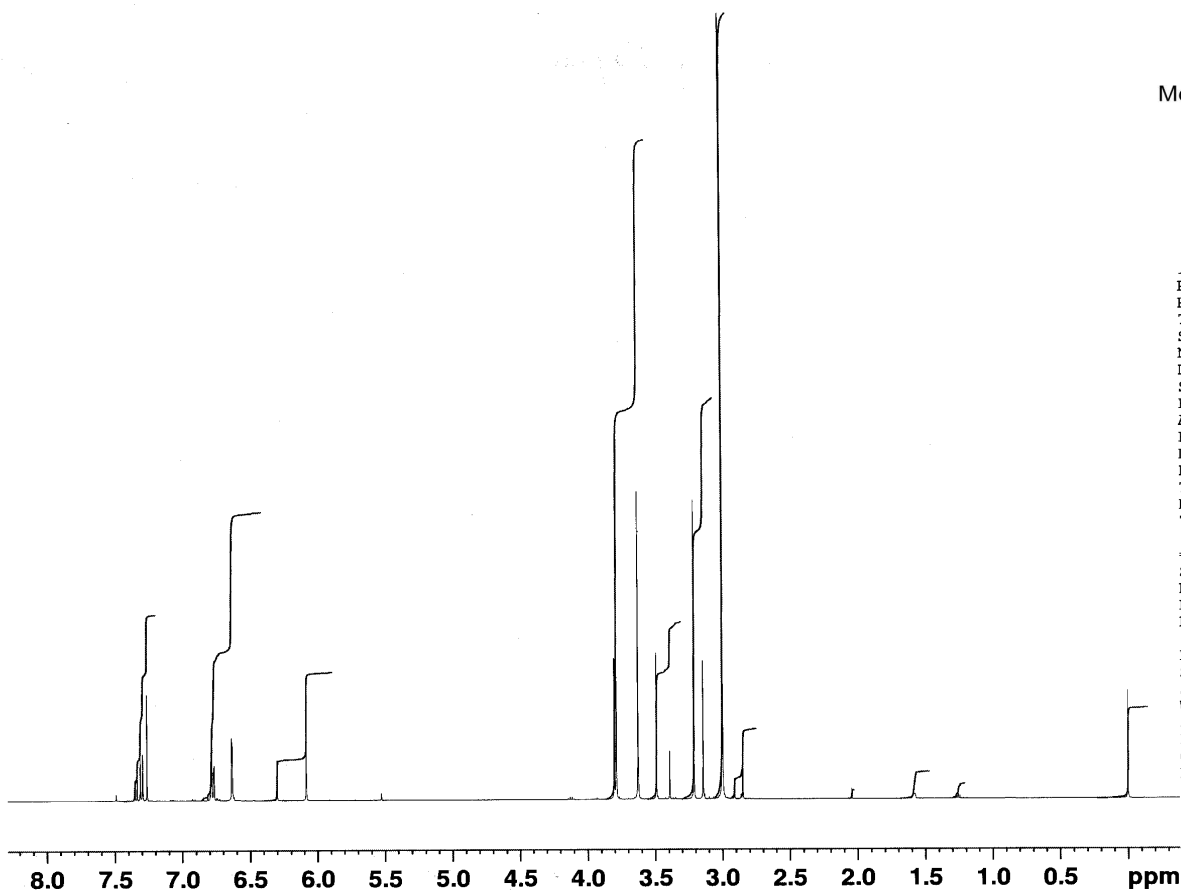

```

INSTRUM      spect
PROBHD       5 mm CPPBBO BB
PULPROG      zg30
TD           65536
SOLVENT      CDCl3
NS           16
DS           2
SWH          10000.000 Hz
FIDRES       0.152588 Hz
AQ           3.2767999 sec
RG           31.29
DW           50.000 usec
DE           10.00 usec
TE           300.1 K
D1           1.00000000 sec
TDO         1
  
```

```

===== CHANNEL f1 =====
SFO1         500.1730888 MHz
NUC1         1H
P1           12.00 usec
PLW1         13.50000000 W
  
```

```

F2 - Processing parameters
SI           65536
SF           500.1700108 MHz
WDW          EM
SSB          0
LB           0.30 Hz
GB           0
PC           1.00
  
```

169.288  
 168.857  
 152.541  
 140.682  
 140.416  
 124.333  
 123.906  
 123.373  
 122.831  
 114.337  
 114.272  
 107.758  
 106.674  
 106.329  
 104.972  
 104.906  
 56.130  
 54.181  
 52.953  
 52.808  
 52.731  
 50.880  
 50.561  
 41.867  
 40.583

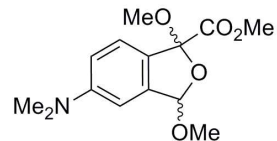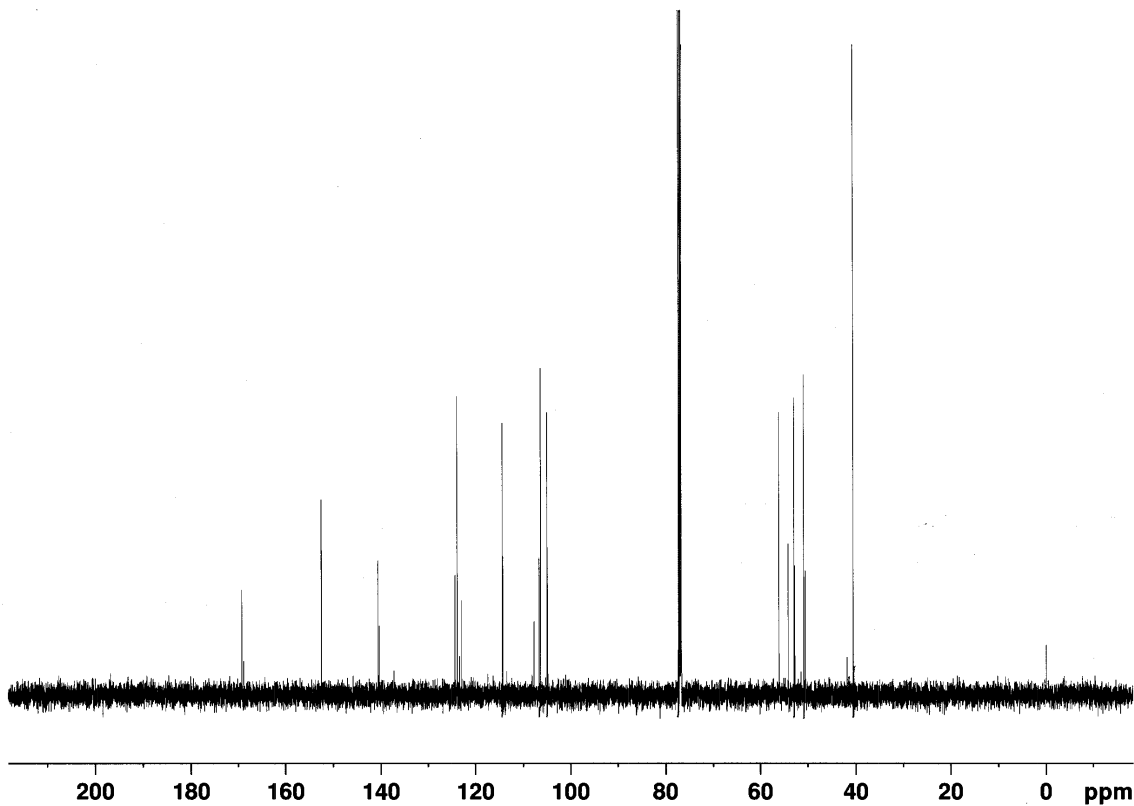

```

MUS          107.14
DW           16.800 usec
DE           11.00 usec
TE           300.1 K
D1           2.00000000 sec
D11          0.03000000 sec
TDO         1
  
```

```

===== CHANNEL f1 =====
SFO1         125.7804227 MHz
NUC1         13C
P1           10.00 usec
PLW1         65.00000000 W
  
```

```

===== CHANNEL f2 =====
SFO2         500.1720007 MHz
NUC2         1H
CPDPRG[2]   waltz16
PCPD2        80.00 usec
PLW2         13.50000000 W
PLW12        0.30375001 W
PLW13        0.19440000 W
  
```

```

F2 - Processing parameters
SI           32768
SF           125.7678470 MHz
WDW          EM
SSB          0
LB           1.00 Hz
GB           0
PC           1.40
  
```

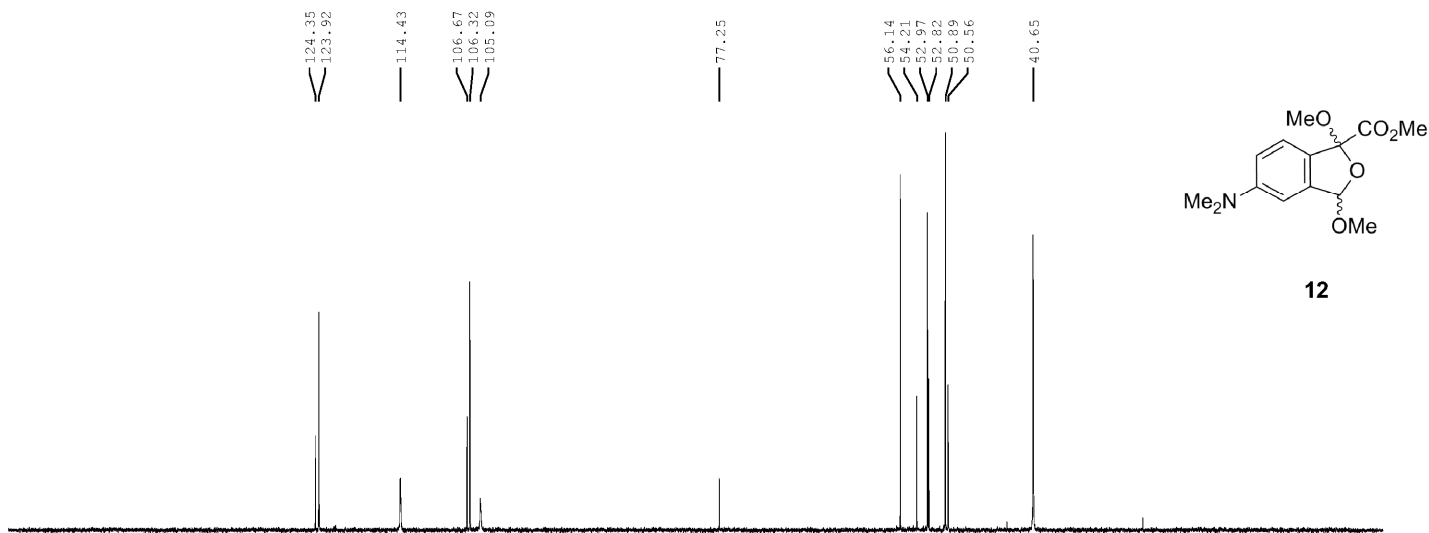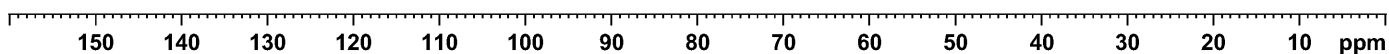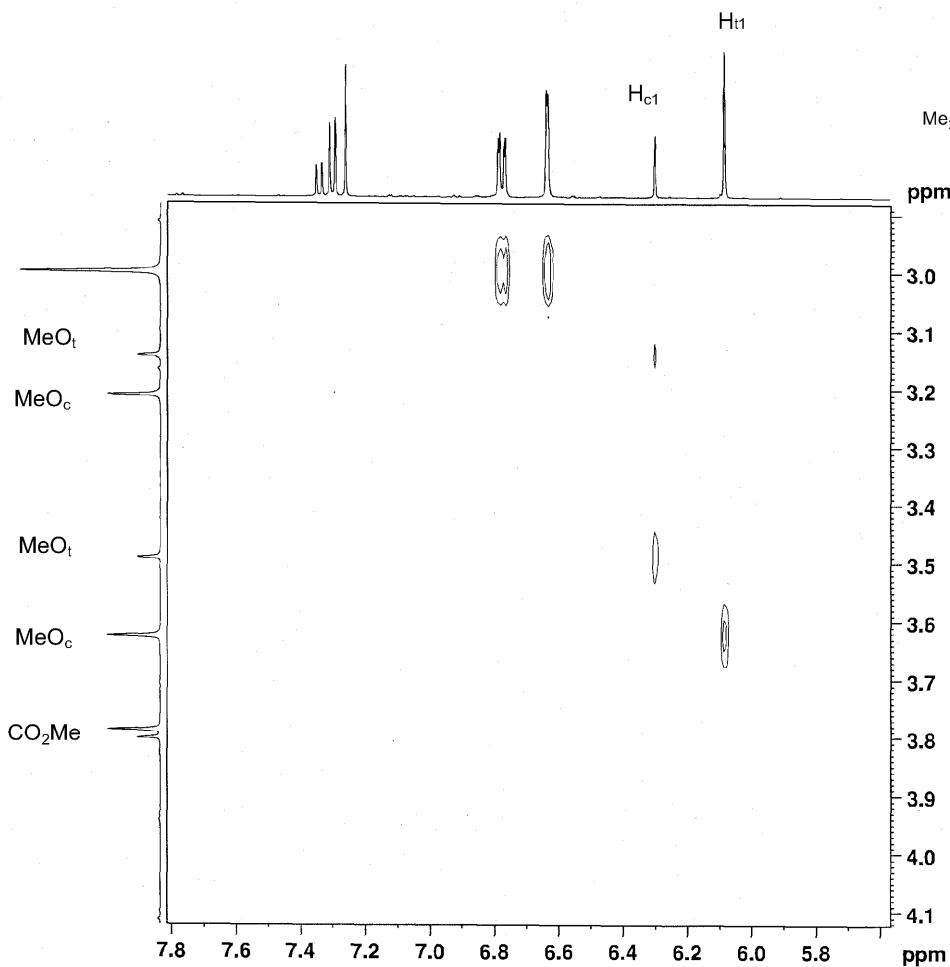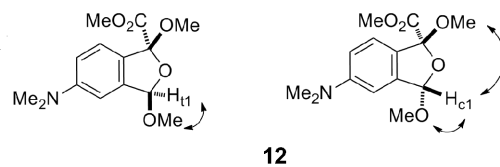

```

SOLVENT      CDCl3
NS           4
DS           32
SWH          4237.288 Hz
FIDRES       2.068988 Hz
AQ           0.2416640 sec
RG           17.03
DW           118.000 usec
DE           10.00 usec
TE           300.1 K
D0           0.00010232 sec
D1           1.96313586 sec
D8           0.30000001 sec
D11          0.03300000 sec
D12          0.00002000 sec
D16          0.00010000 sec
IN0          0.00023600 sec

----- CHANNEL f1 -----
SF01         500.1718560 MHz
NUC1         1H
P1           12.00 usec
P2           24.00 usec
P17          2500.00 usec
PLW1         13.50000000 W
PLW2         2.87570000 W

----- GRADIENT CHANNEL -----
GPNAM[1]     SPSQ10.00
GP2         40.00 %
P16         1000.00 usec

F1 - Acquisition parameters
TD          256
SF01        500.1719 MHz
FIDRES      16.551907 Hz
SW           8.472 PPM
PRMODE      States-TPPI

F2 - Processing parameters
SI          1024
SP          500.1700102 MHz
WDW         COSINE
SSB         2
LB           0 Hz
GB           0
PC           1.00

F1 - Processing parameters
SI          1024
MC2         States-TPPI
SF          500.1700102 MHz
WDW         COSINE
SSB         2
LB           0 Hz
GB           0
  
```

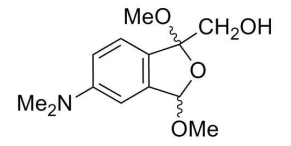

14

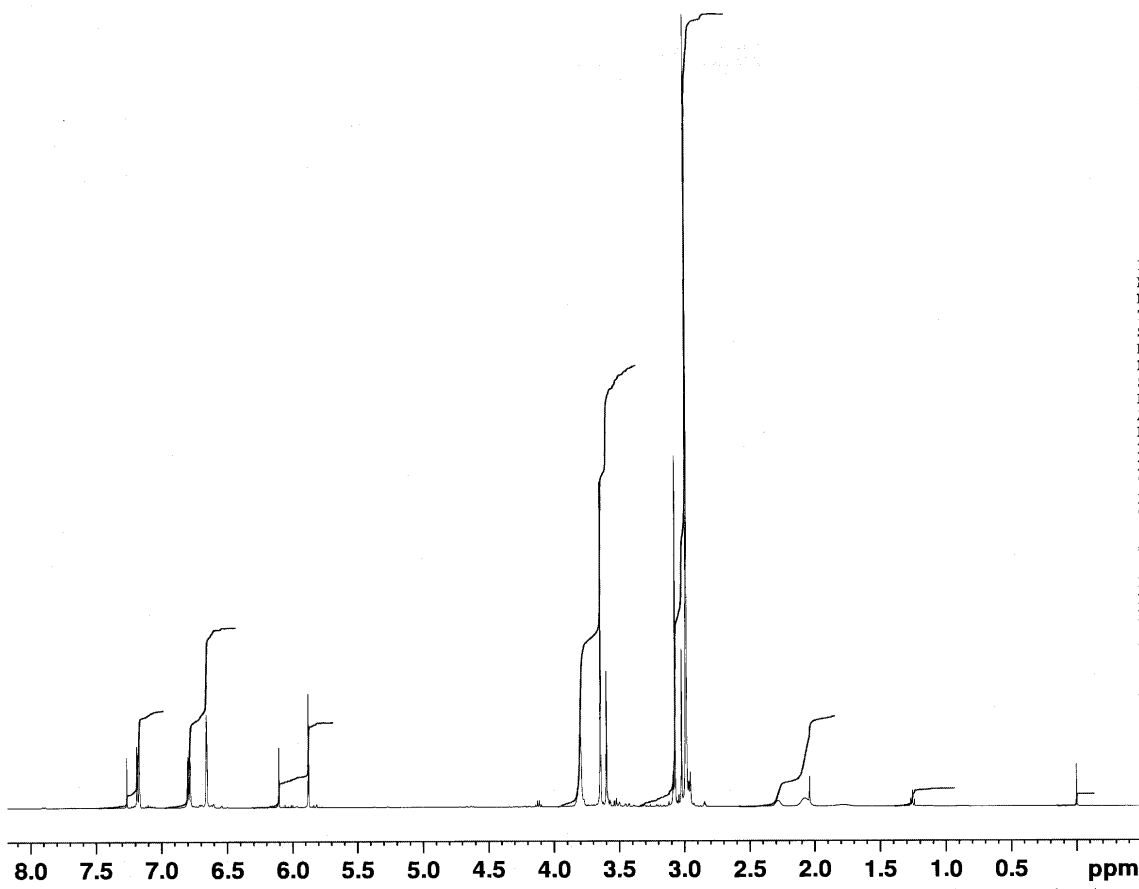

```

INSTRUM      spect
PROCDD      5 mm CFFBEO BB
PULPROG      zg30
TD           65536
SOLVENT      CDC13
NS           16
DS           2
SWH          10000.000 Hz
FIDRES       0.152588 Hz
AQ           3.2767999 sec
RG           23.8
DW           50.000 usec
DE           10.00 usec
TE           300.1 K
D1           1.00000000 sec
TDO          1
  
```

```

----- CHANNEL f1 -----
SFO1         500.1730888 MHz
NUC1          1H
P1            12.00 usec
PLW1         13.50000000 W
  
```

```

F2 - Processing parameters
SI            65536
SF            500.1700095 MHz
WDW           EM
SSB           0
LB            0.30 Hz
GB            0
PC            1.00
  
```

152.275  
 152.189  
 141.291  
 141.085  
 124.052  
 123.833  
 123.256  
 123.184  
 114.439  
 113.019  
 111.081  
 106.603  
 105.931  
 105.340  
 105.282  
 105.258  
 105.066  
 77.319  
 77.065  
 76.811  
 67.787  
 67.331  
 66.835  
 60.388  
 56.408  
 56.043  
 50.368  
 49.968  
 40.868  
 40.661  
 40.076  
 21.034  
 14.196  
 -0.003

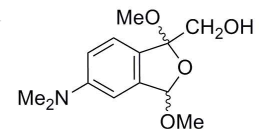

14

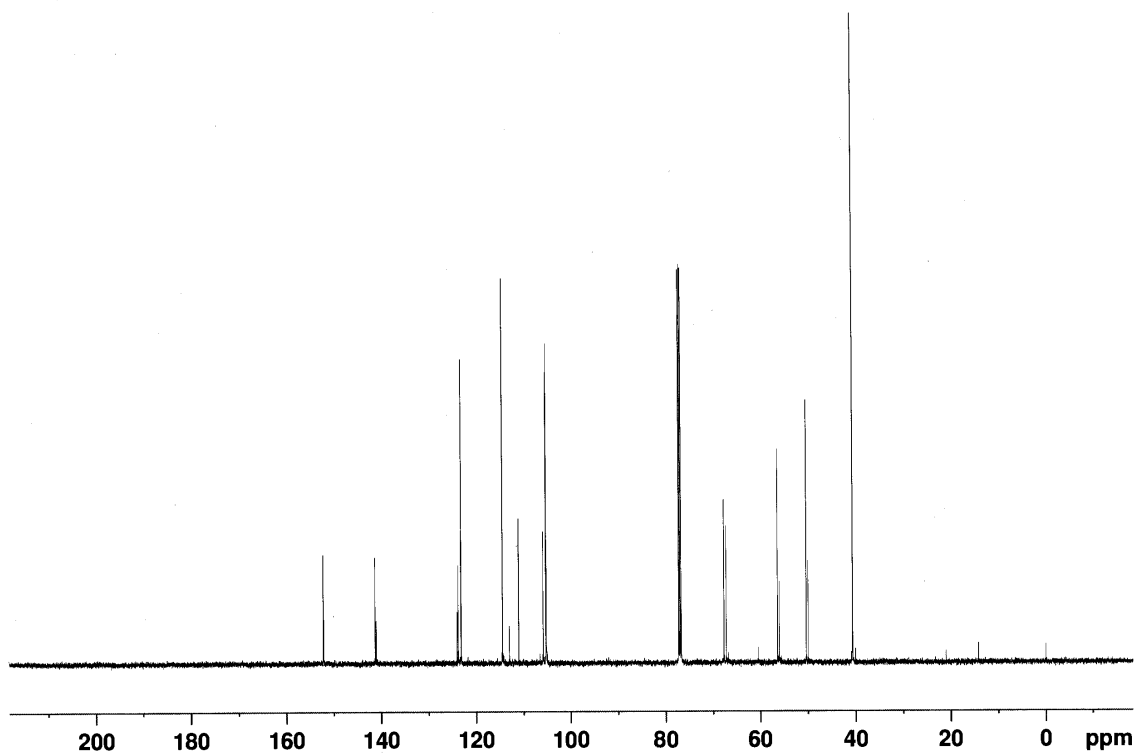

```

PULPROG      zgpg30
TD           65536
SOLVENT      CDC13
NS           64
DS           4
SWH          29761.904 Hz
FIDRES       0.454131 Hz
AQ           1.1010048 sec
RG           107.18
DW           16.800 usec
DE           11.00 usec
TE           300.1 K
D1           2.00000000 sec
D11          0.03000000 sec
TDO          1
  
```

```

----- CHANNEL f1 -----
SFO1         125.7804227 MHz
NUC1          13C
P1            10.00 usec
PLW1         65.00000000 W
  
```

```

----- CHANNEL f2 -----
SFO2         500.1720007 MHz
NUC2          1H
CPDPRG[2]    waltz16
PCPD2        80.00 usec
PLW2         13.50000000 W
PLW12        0.30375001 W
PLW13        0.19440000 W
  
```

```

F2 - Processing parameters
SI            32768
SF            125.7678470 MHz
WDW           EM
SSB           0
LB            1.00 Hz
GB            0
PC            1.40
  
```

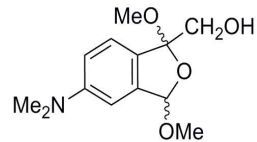

14

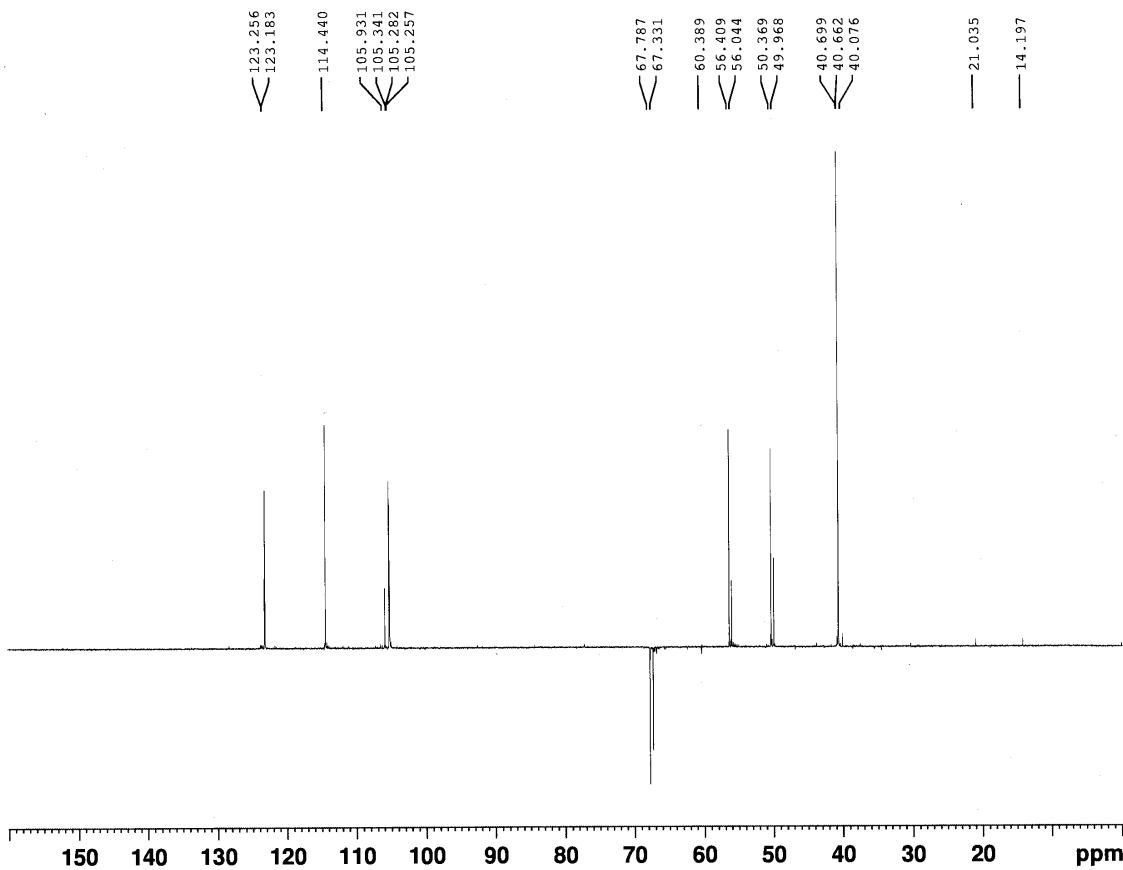

SOLVENT CDC13  
 NS 168  
 DS 4  
 SWH 20161.291 Hz  
 FIDRES 0.307637 Hz  
 AQ 1.6252928 sec  
 RG 189.66  
 DW 24.800 usec  
 DE 11.00 usec  
 TE 300.2 K  
 CNST2 145.0000000  
 D1 2.000000000 sec  
 D2 0.00344828 sec  
 D12 0.00002000 sec  
 TD0 1

===== CHANNEL f1 =====  
 SFO1 125.7779074 MHz  
 NUC1 13C  
 P1 10.00 usec  
 P13 2000.00 usec  
 PLW0 0 W  
 PLW1 65.00000000 W  
 SPNAM[5] Crp60comp.4  
 SPOAL5 0.500  
 SPOFFS5 0 Hz  
 SPW5 9.93130016 W

===== CHANNEL f2 =====  
 SFO2 500.1715996 MHz  
 NUC2 1H  
 CPDPRG[2] waltz16  
 F3 12.00 usec  
 F4 24.00 usec  
 PCPD2 80.00 usec  
 PLW2 13.50000000 W  
 PLW12 0.30375001 W

F2 - Processing parameters  
 SI 32768  
 SF 125.7678470 MHz  
 WDW EM  
 SSB 0  
 LB 1.00 Hz  
 GB 0

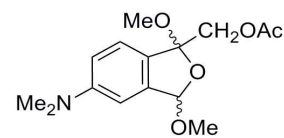

10

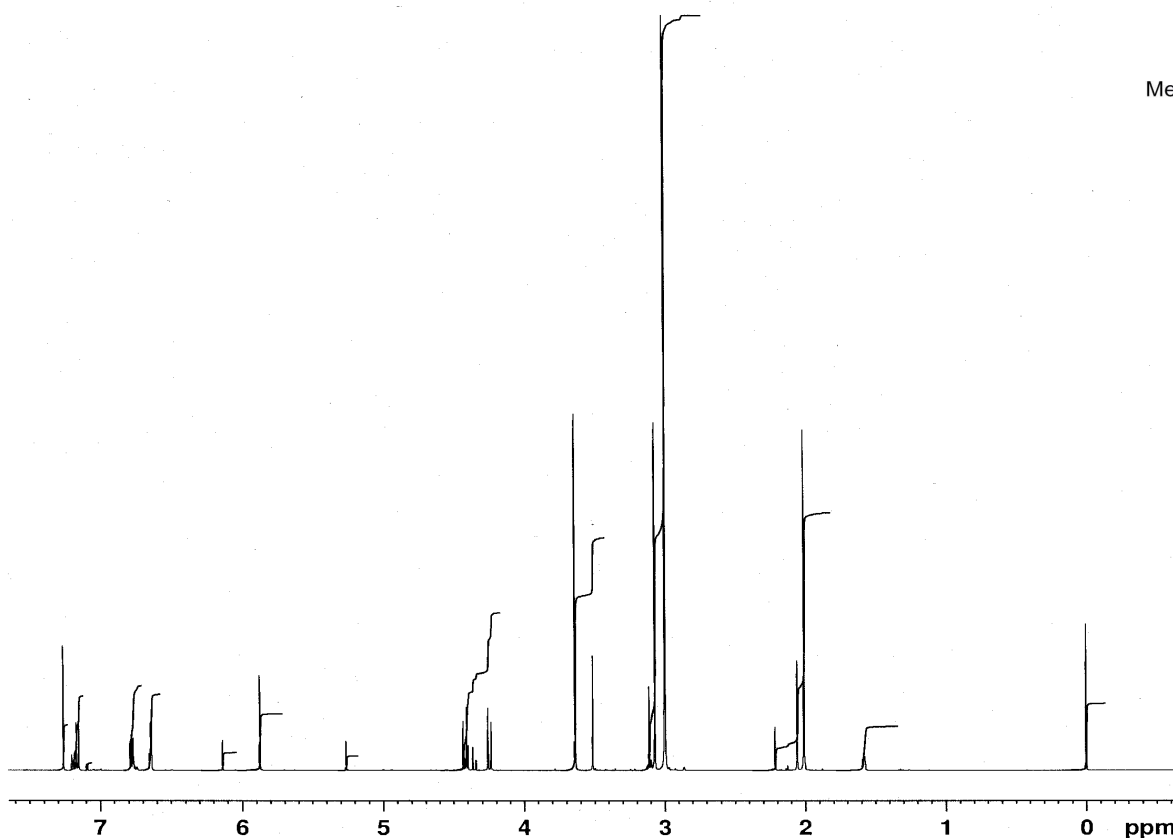

PROBHD 5 mm CPPBBO BB  
 PULPROG zg30  
 TD 65536  
 SOLVENT CDC13  
 NS 16  
 DS 2  
 SWH 10000.000 Hz  
 FIDRES 0.152588 Hz  
 AQ 3.2767999 sec  
 RG 31.29  
 DW 50.000 usec  
 DE 10.00 usec  
 TE 300.1 K  
 D1 1.00000000 sec  
 TD0 1

===== CHANNEL f1 =====  
 SFO1 500.1730888 MHz  
 NUC1 1H  
 P1 12.00 usec  
 PLW1 13.50000000 W

F2 - Processing parameters  
 SI 65536  
 SF 500.1700109 MHz  
 WDW EM  
 SSB 0  
 LB 0.30 Hz  
 GB 0  
 PC 1.00



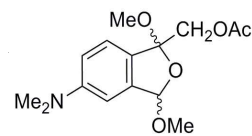

10

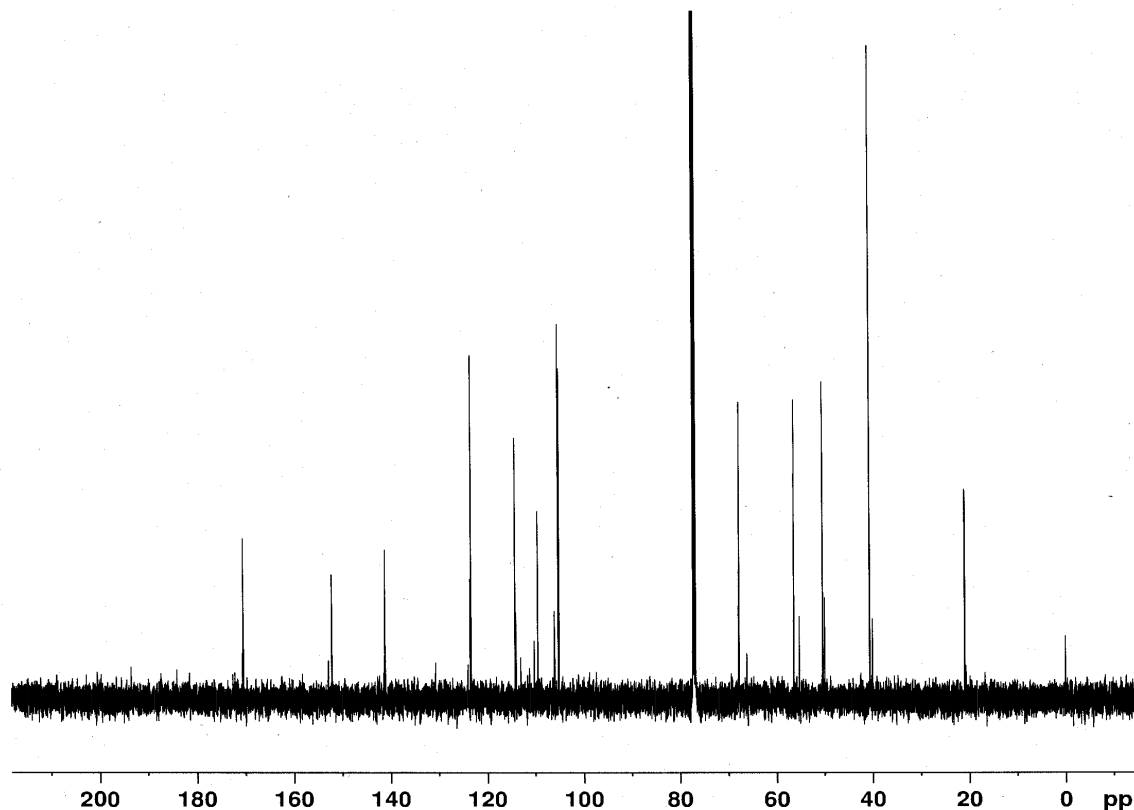

```

time 15.23
INSTRUM spect
PROBHD 5 mm QNPBBO BB
PULPROG zgpg30
TD 65536
SOLVENT CDC13
NS 32
DS 4
SWH 29761.904 Hz
FIDRES 0.454131 Hz
AQ 1.1010048 sec
RG 189.66
DW 16.800 usec
DE 11.00 usec
TE 300.2 K
D1 2.00000000 sec
D11 0.03000000 sec
TD0 1

```

```

===== CHANNEL f1 =====
SFO1 125.7804227 MHz
NUC1 13C
P1 10.00 usec
PLW1 65.00000000 W

```

```

===== CHANNEL f2 =====
SFO2 500.1720007 MHz
NUC2 1H
CPDPRG[2] waltz16
PCPD2 80.00 usec
PLW2 13.50000000 W
PLW12 0.30375001 W
PLW13 0.19440000 W

```

```

F2 - Processing parameters
SI 32768
SF 125.7678470 MHz
WDW EM
SSB 0
LB 1.00 Hz
GB 0
PC 1.40

```

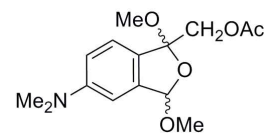

10

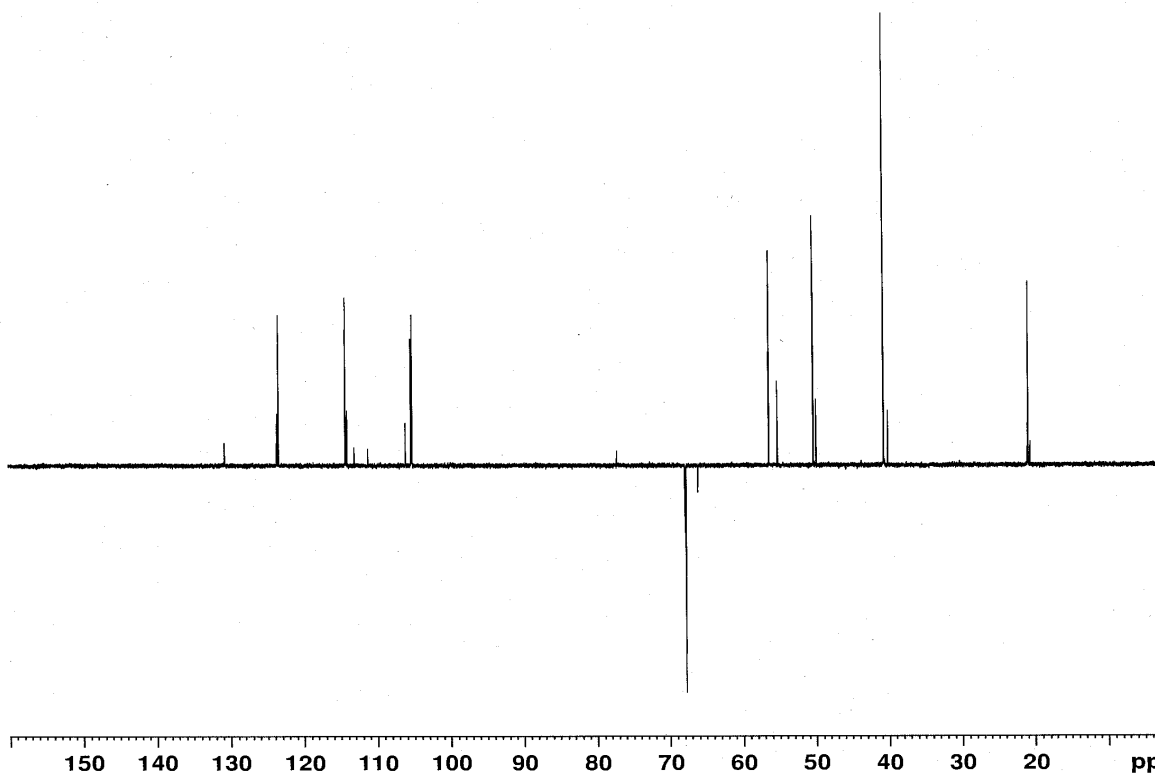

```

PROBHD 5 mm CPPBBO BB
PULPROG deptsp135
TD 65536
SOLVENT CDC13
NS 249
DS 4
SWH 20161.291 Hz
FIDRES 0.307637 Hz
AQ 1.6252928 sec
RG 189.66
DW 24.800 usec
DE 11.00 usec
TE 300.2 K
CNST2 145.0000000
D1 2.00000000 sec
D2 0.00344828 sec
D12 0.00002000 sec
TD0 1

```

```

===== CHANNEL f1 =====
SFO1 125.7779074 MHz
NUC1 13C
P1 10.00 usec
P13 2000.00 usec
PLW0 0 W
PLW1 65.00000000 W
SPNAM[5] Crp60comp_4
SPOALS 0.500
SPOFFS5 0 Hz
SPW5 9.93130016 W

```

```

===== CHANNEL f2 =====
SFO2 500.1715996 MHz
NUC2 1H
CPDPRG[2] waltz16
P3 12.00 usec
P4 24.00 usec
PCPD2 80.00 usec
PLW2 13.50000000 W
PLW12 0.30375001 W

```

```

F2 - Processing parameters
SI 32768
SF 125.7678464 MHz
WDW EM
SSB 0
LB 1.00 Hz
GB 0
PC 1.40

```

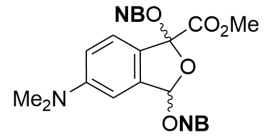

PROBHD 5 mm CPPBBO BB  
 PULPROG zg30  
 TD 65536  
 SOLVENT CDCl3  
 NS 16  
 DS 2  
 SWH 10000.000 Hz  
 FIDRES 0.152588 Hz  
 AQ 3.2767999 sec  
 RG 22.23  
 DW 50.000 usec  
 DE 10.00 usec  
 TE 300.2 K  
 D1 1.00000000 sec  
 TD0 1

===== CHANNEL f1 =====  
 SFO1 500.1730888 MHz  
 NUC1 1H  
 P1 12.00 usec  
 PLW1 13.50000000 W

F2 - Processing parameters  
 SI 65536  
 SF 500.1700124 MHz  
 WDW EM  
 SSB 0  
 LB 0.30 Hz  
 GB 0  
 PC 1.00

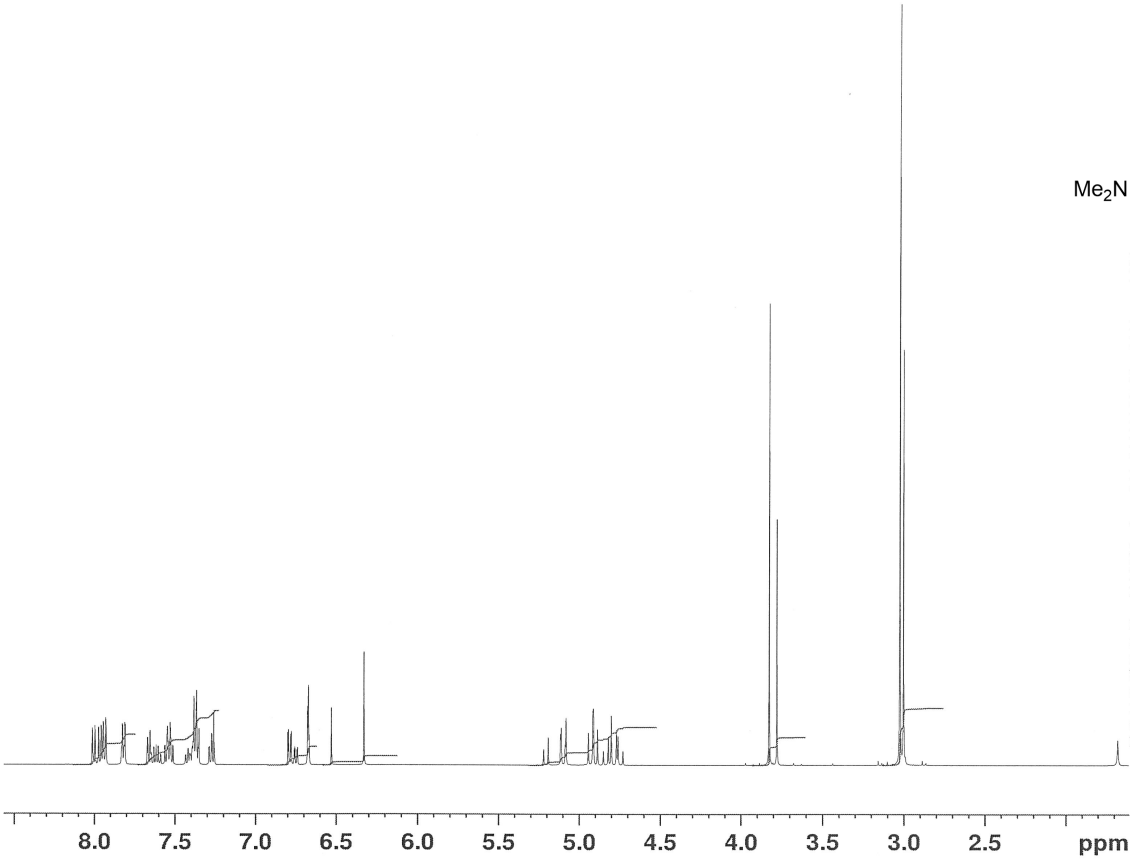

168.960  
 168.620  
 152.764  
 147.767  
 147.101  
 146.910  
 146.929  
 140.152  
 135.528  
 134.398  
 134.390  
 133.775  
 133.767  
 133.650  
 133.474  
 129.759  
 129.284  
 129.156  
 128.933  
 128.297  
 128.115  
 127.898  
 127.598  
 124.598  
 124.525  
 124.499  
 124.289  
 124.203  
 124.010  
 123.202  
 122.803  
 114.621  
 114.524  
 108.415  
 108.011  
 106.379  
 105.815  
 105.201  
 105.094

67.575  
 66.045  
 62.774  
 62.212  
 53.178  
 52.983

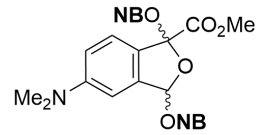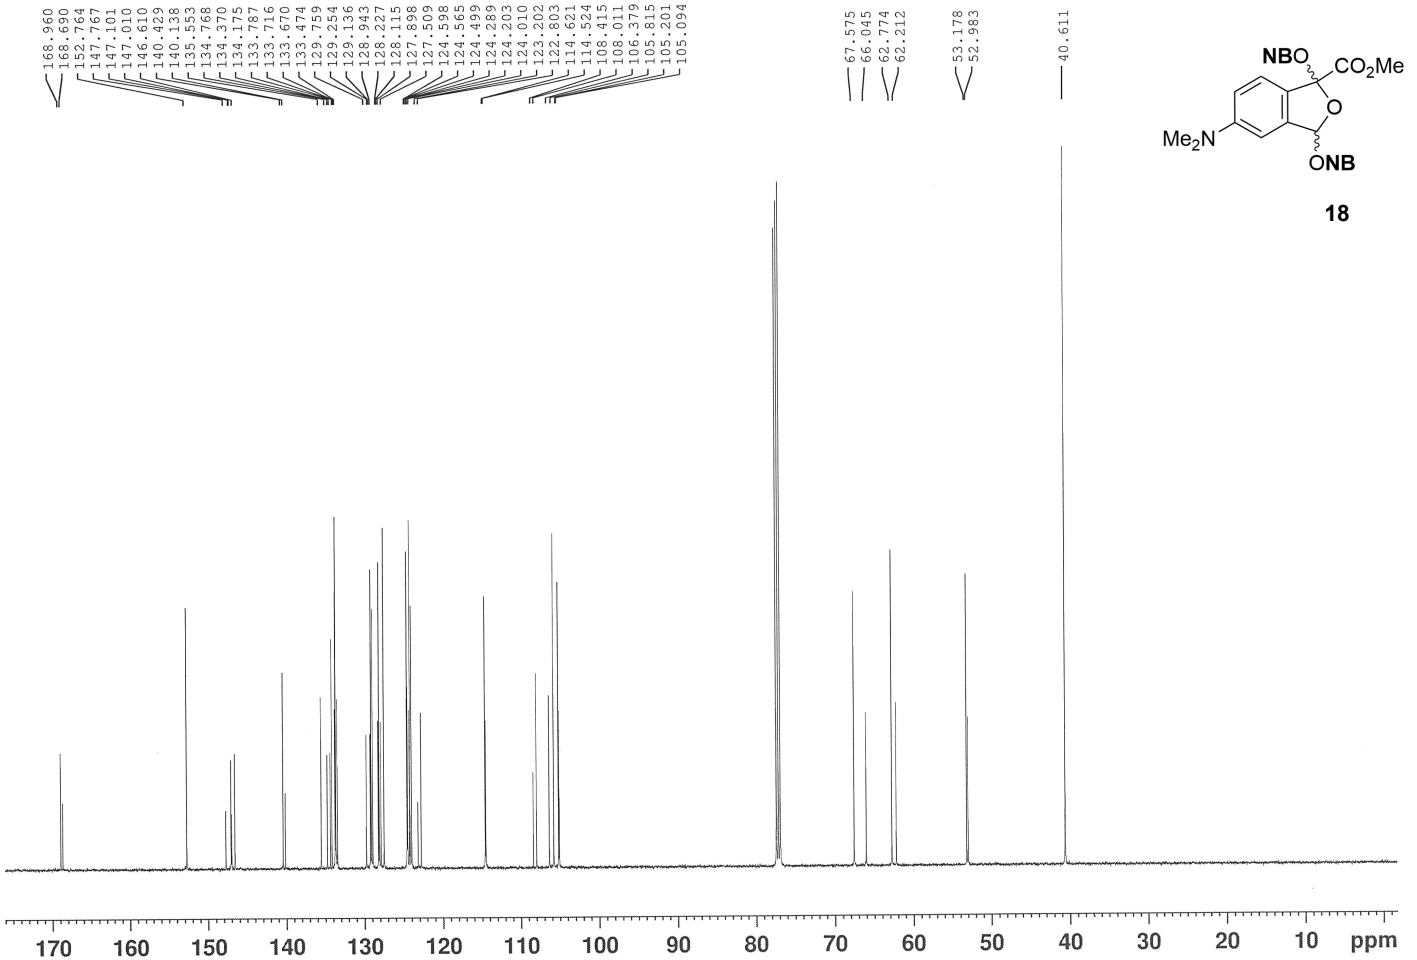

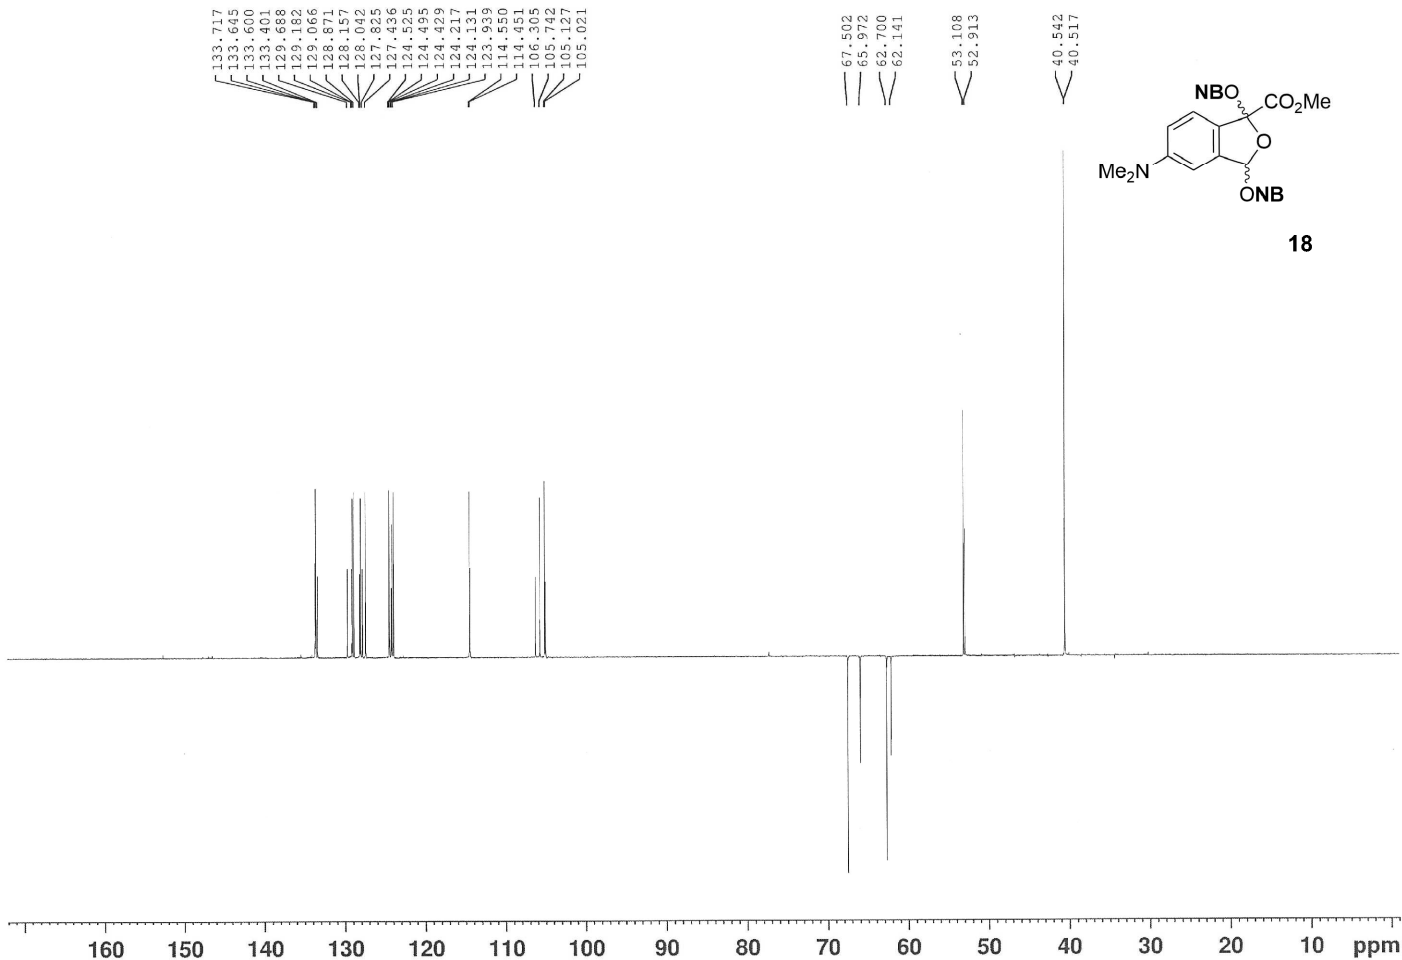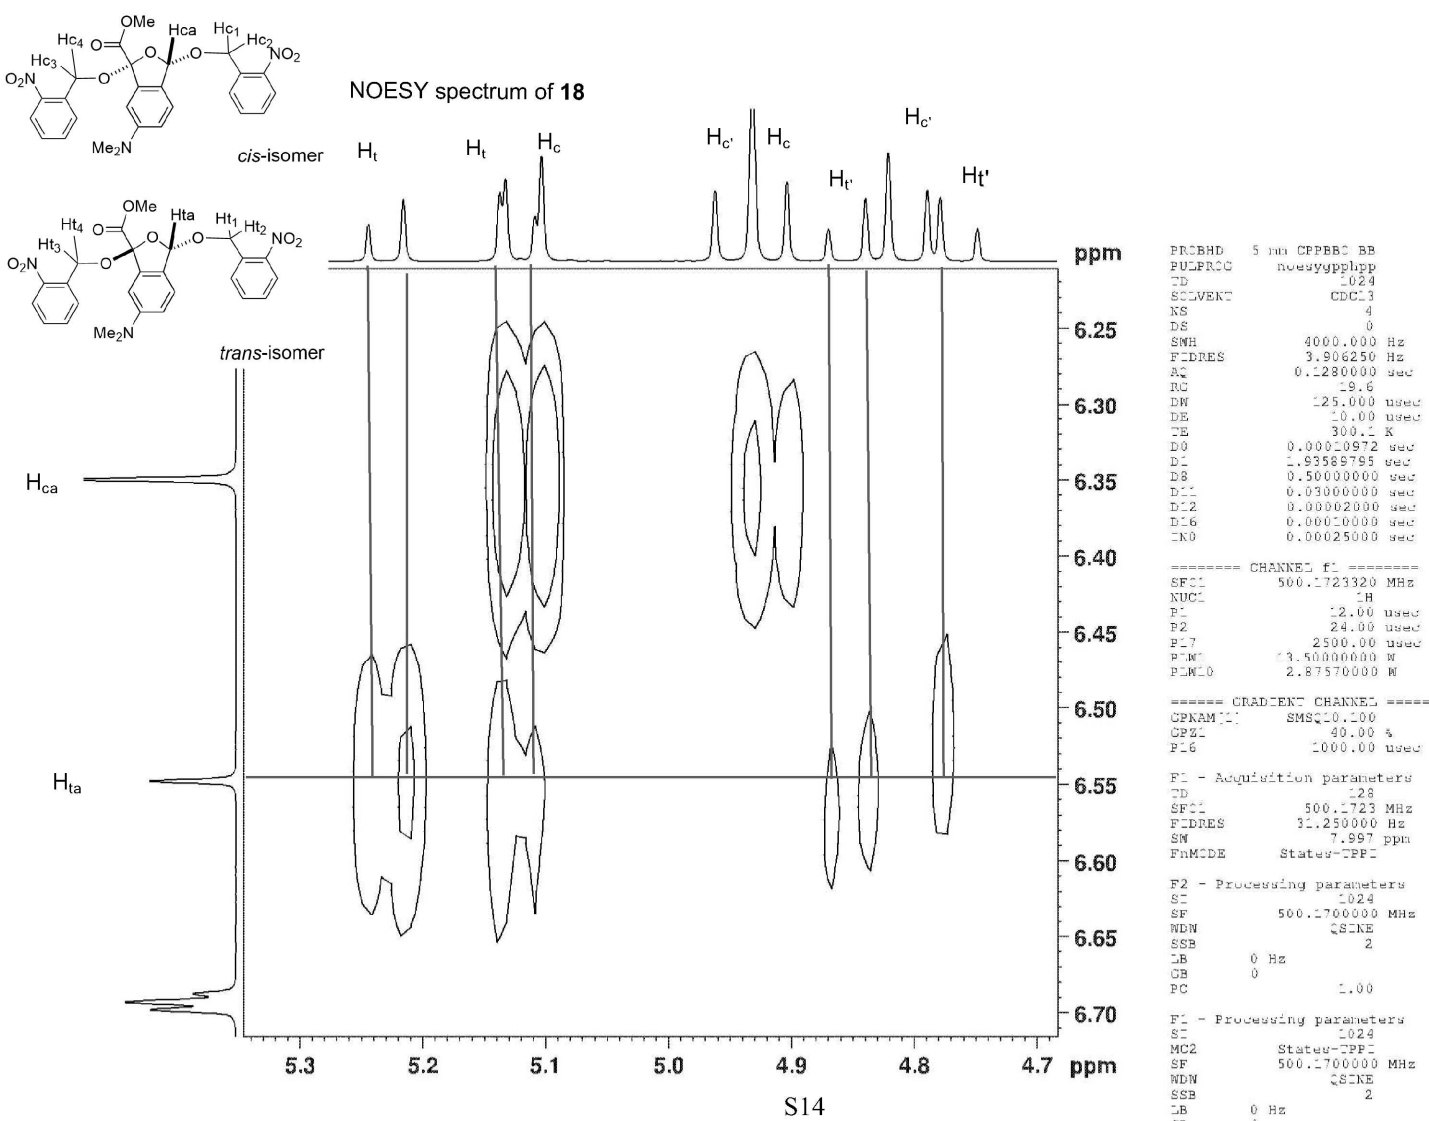

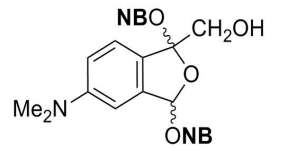

17

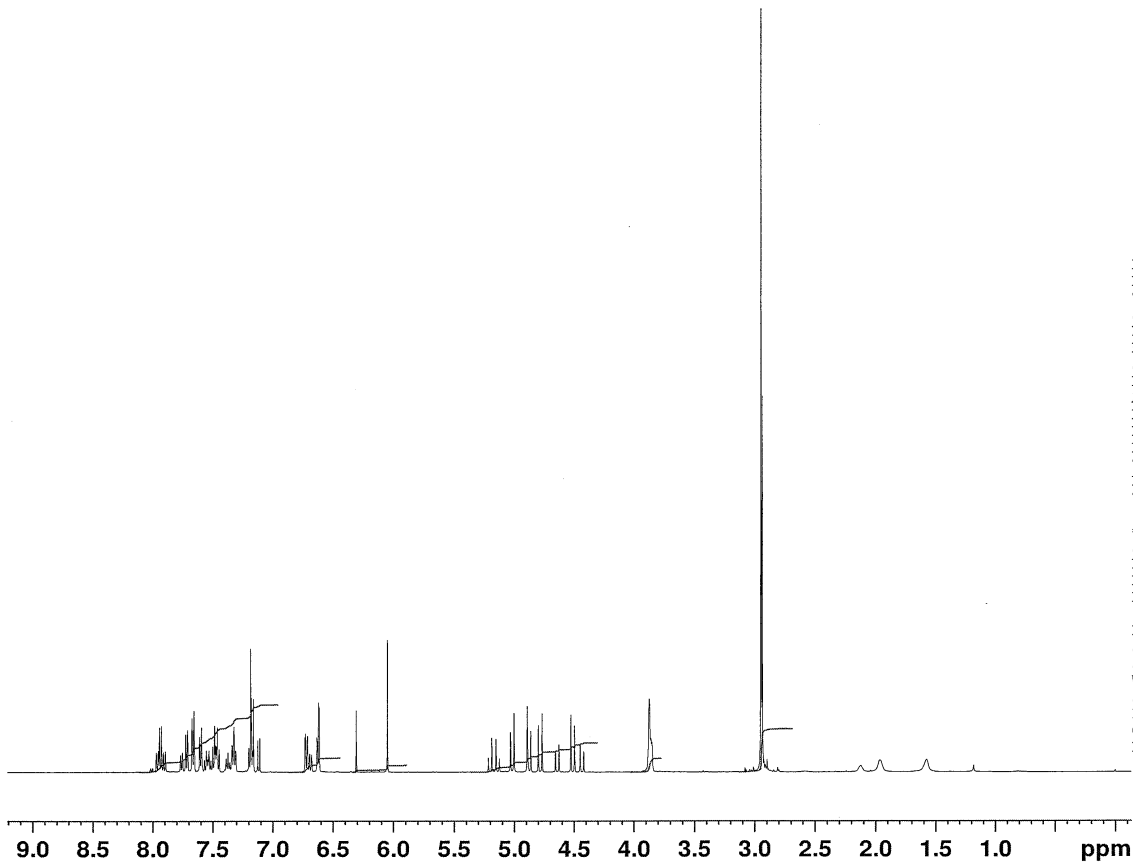

```

INSIRUM          spect
PROBHD           5 mm CPPBBO BB
PULPROG          zg30
TD               65536
SOLVENT          CDC13
NS               16
DS               2
SWH              10000.000 Hz
FIDRES           0.152588 Hz
AQ               3.2767999 sec
RG               31.29
DW               50.000 usec
DE               10.00 usec
TE               300.2 K
D1               1.00000000 sec
TD0              1

===== CHANNEL f1 =====
SFO1             500.1730888 MHz
NUC1              1H
P1                12.00 usec
PLW1             13.50000000 W

F2 - Processing parameters
SI                65536
SF               500.1700505 MHz
WDW              EM
SSB              0
LB                0.30 Hz
GB               0
PC                1.00
  
```

152.518  
152.506  
147.861  
147.393  
147.175  
147.126  
141.094  
140.818  
135.973  
134.948  
134.240  
134.221  
133.943  
133.830  
133.641  
133.613  
133.343  
129.978  
129.629  
129.301  
128.948  
128.576  
128.127  
127.958  
127.532  
125.086  
124.882  
124.635  
124.160  
123.820  
123.678  
123.242  
114.757  
114.733  
113.297  
111.717  
105.673  
105.611  
105.559  
104.632

67.981  
67.809  
67.793  
67.507  
62.359  
61.539

40.741

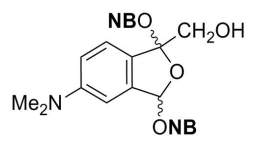

17

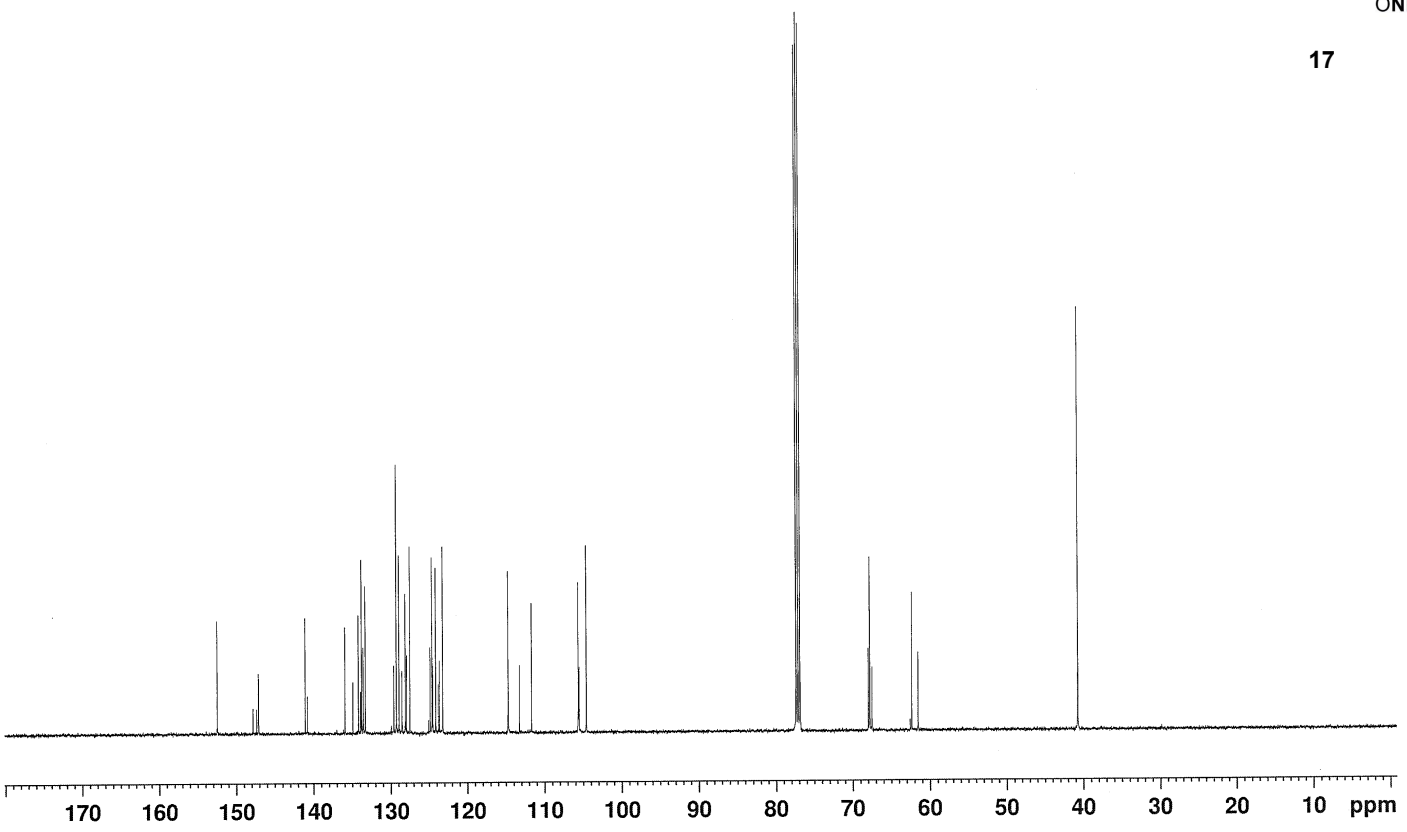

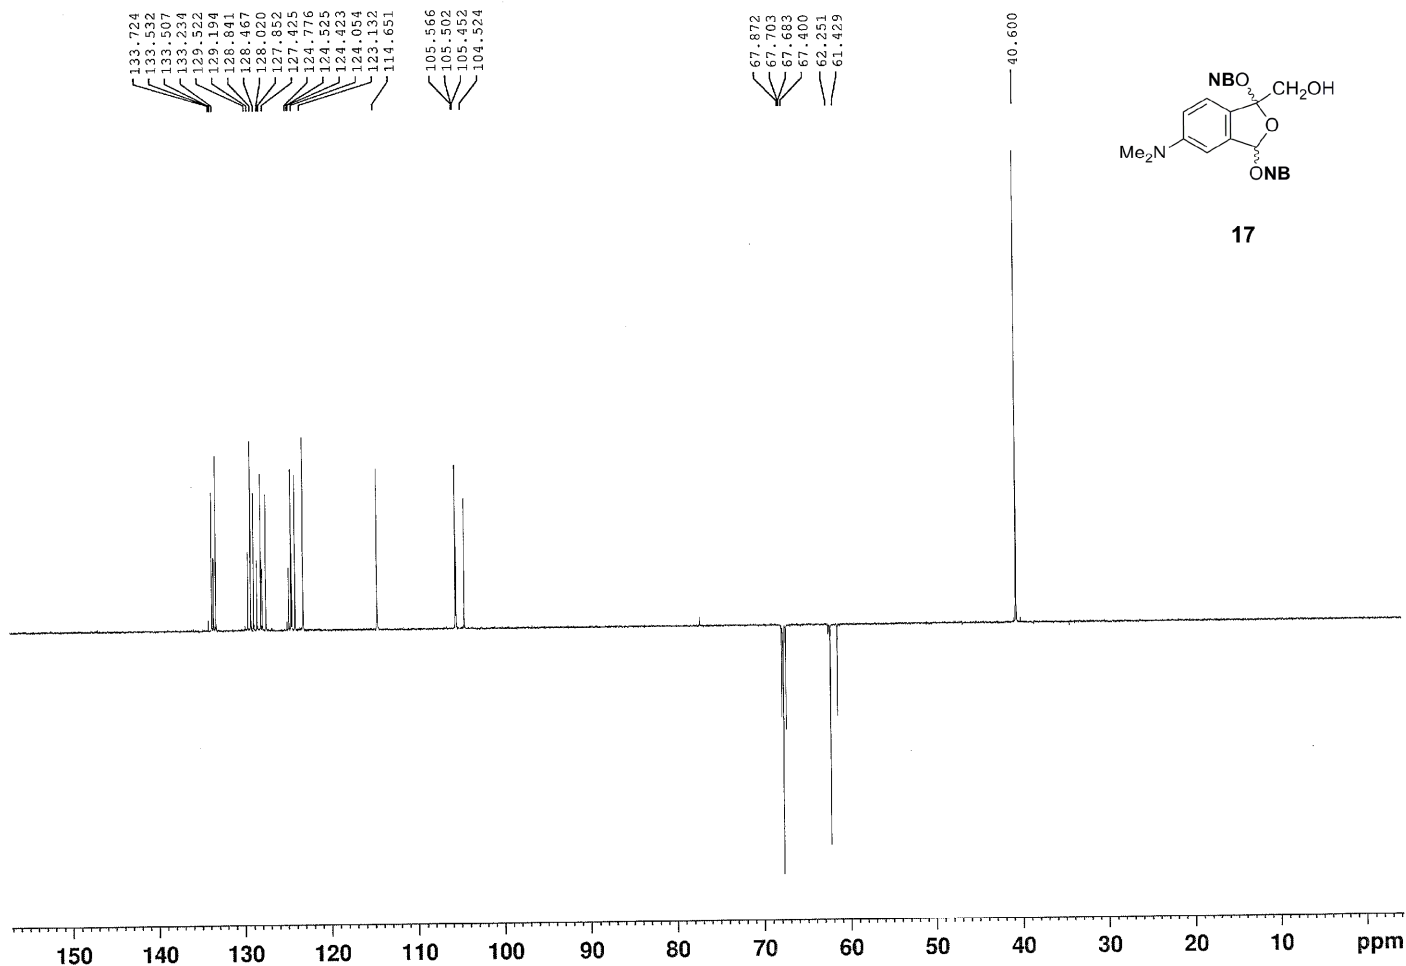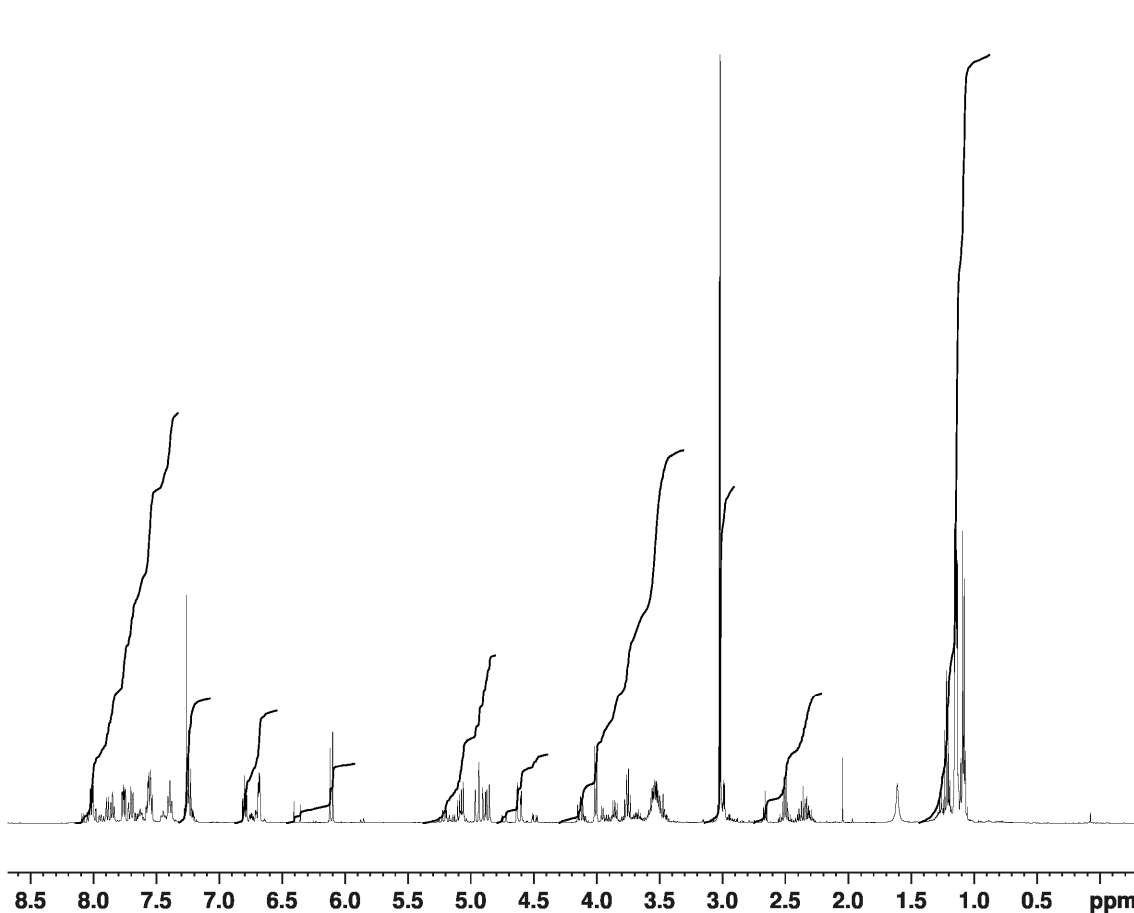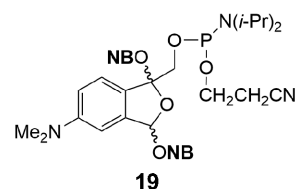

**19**

Current Data Parameters  
 NAME amidite2  
 EXPNO 10  
 PROCNO 1

F2 - Acquisition Parameters  
 Date\_ 20230912  
 Time 21.05 h  
 INSTRUM spect  
 PROBHD z119470\_0344 (  
 PULPROG zg30  
 TD 65536  
 SOLVENT CDCl3  
 NS 16  
 DS 2  
 SWH 10000.000 Hz  
 FIDRES 0.305176 Hz  
 AQ 3.2767999 sec  
 RG 65.87  
 DW 50.000 usec  
 DE 13.13 usec  
 TE 298.0 K  
 D1 1.00000000 sec  
 TD0 1  
 SFO1 500.1730885 MHz  
 NUC1 1H  
 P0 4.83 usec  
 P1 14.50 usec  
 PLW1 10.80000019 W

F2 - Processing parameters  
 SI 65536  
 SF 500.1700129 MHz  
 WDW EM  
 SSB 0  
 LB 0.30 Hz  
 GB 0  
 PC 1.00

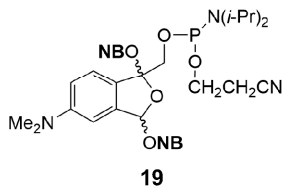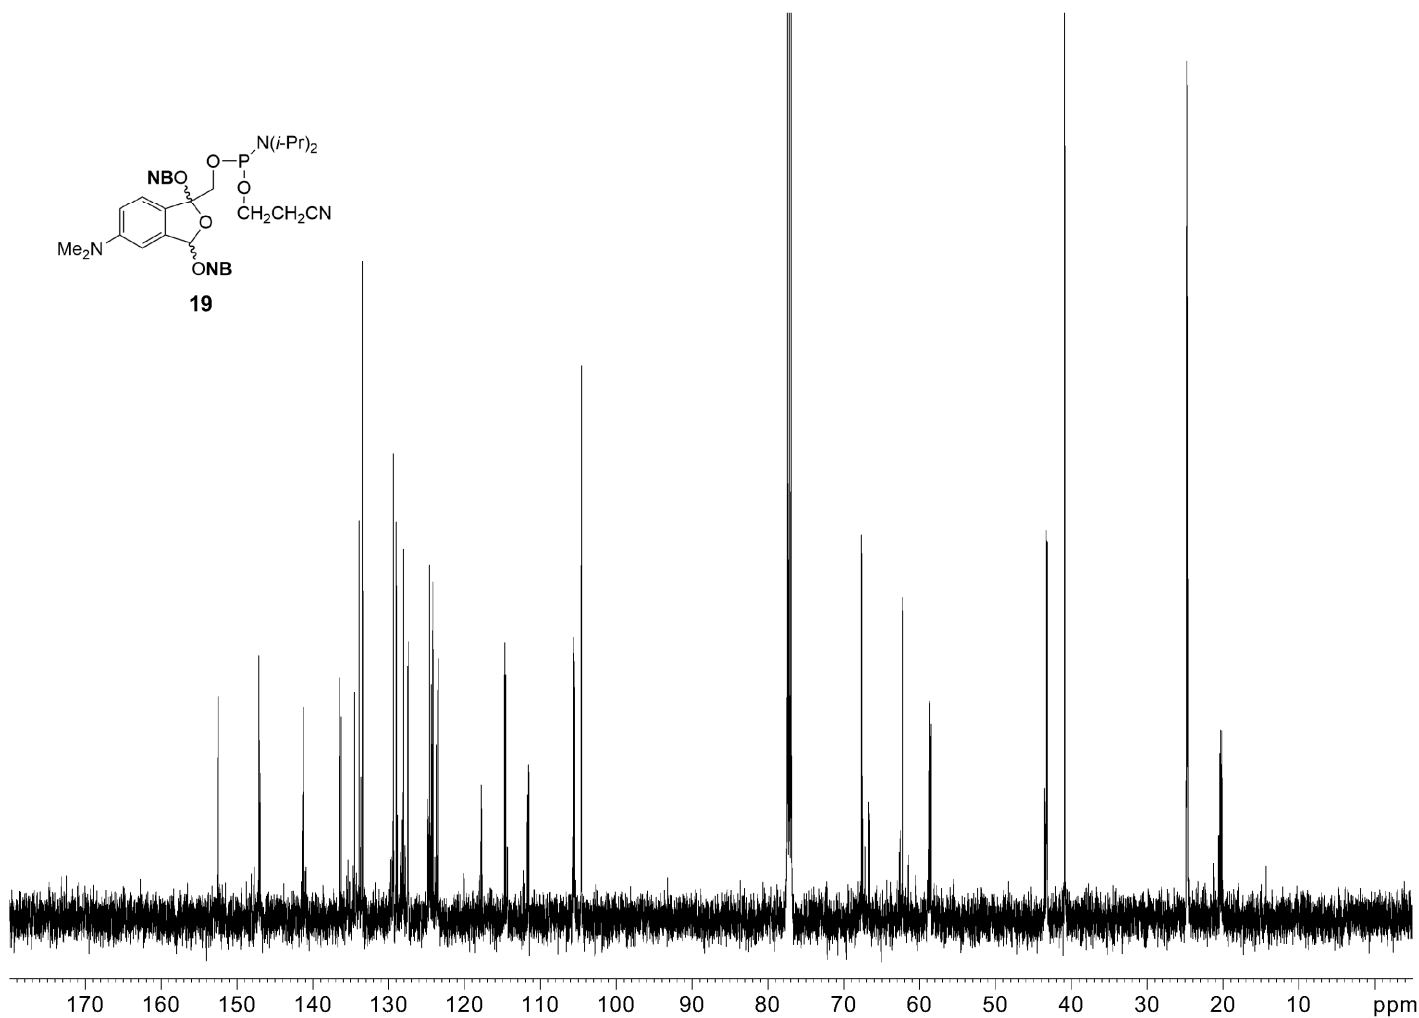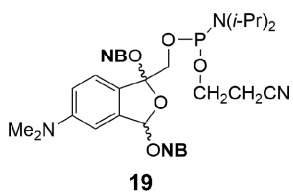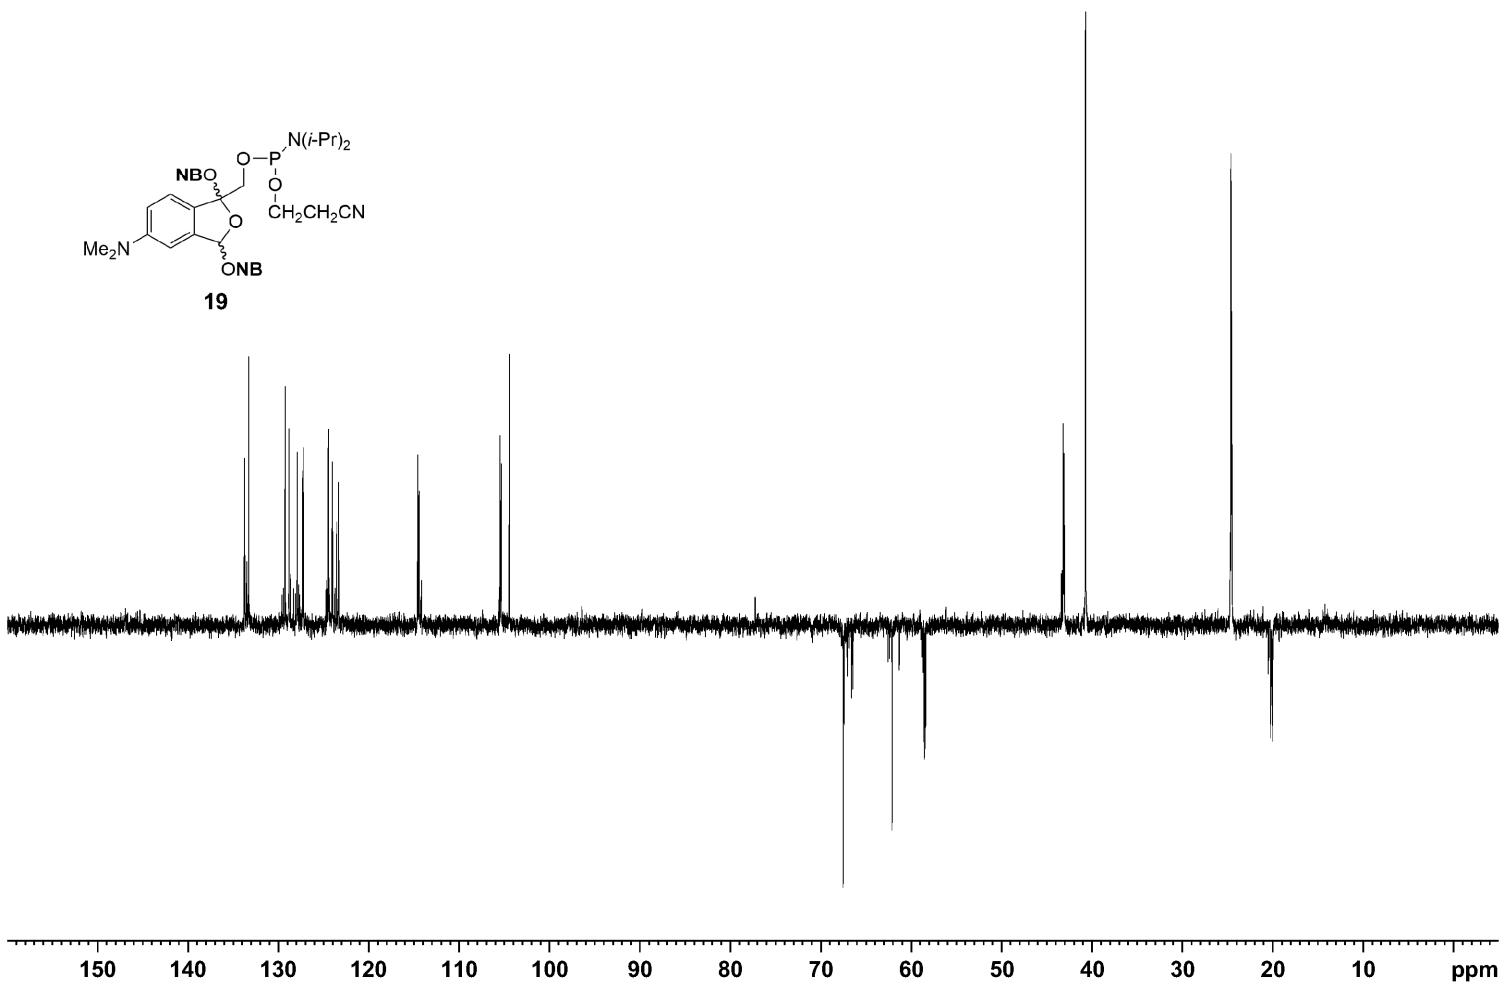

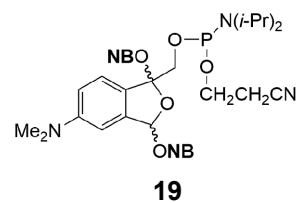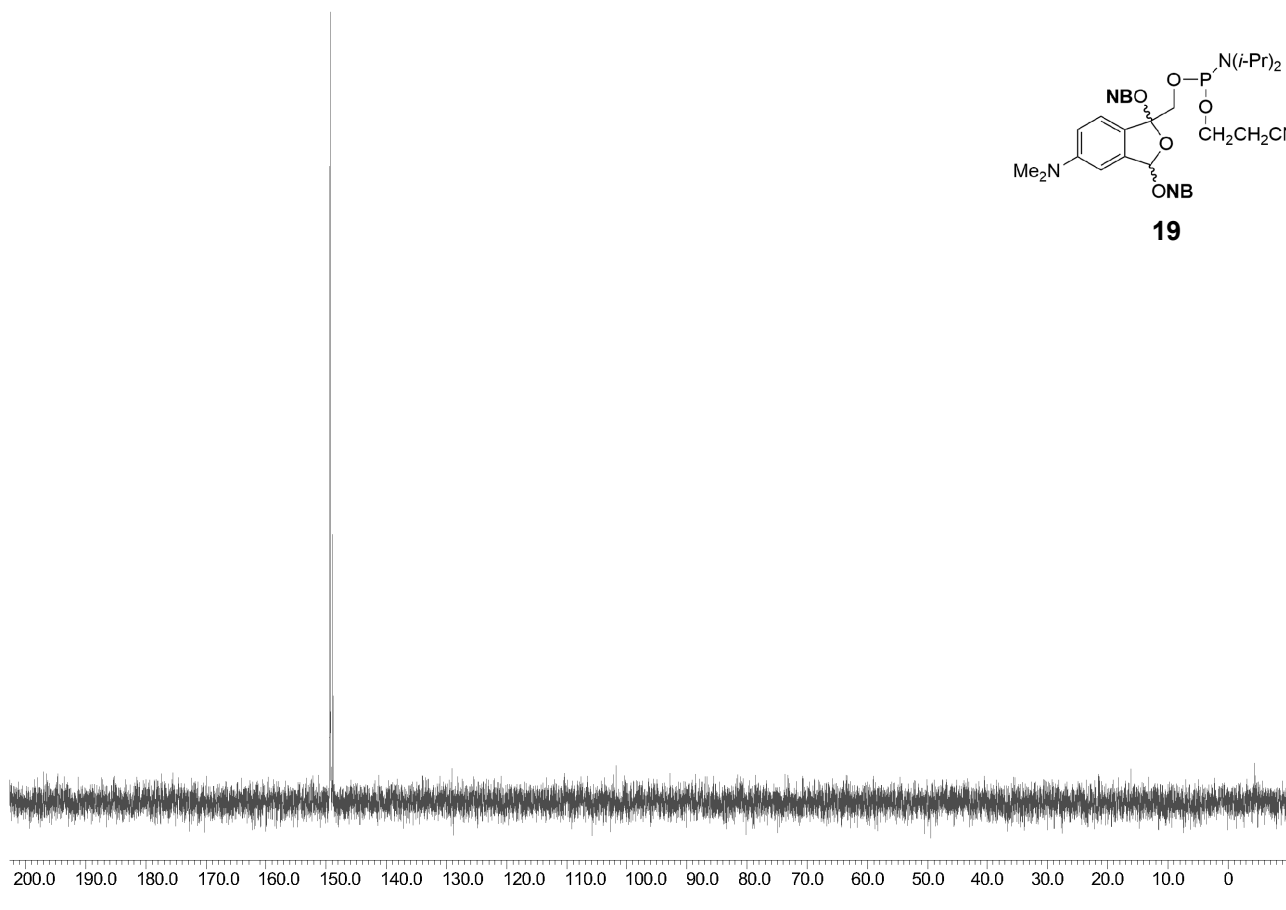

Comment 2

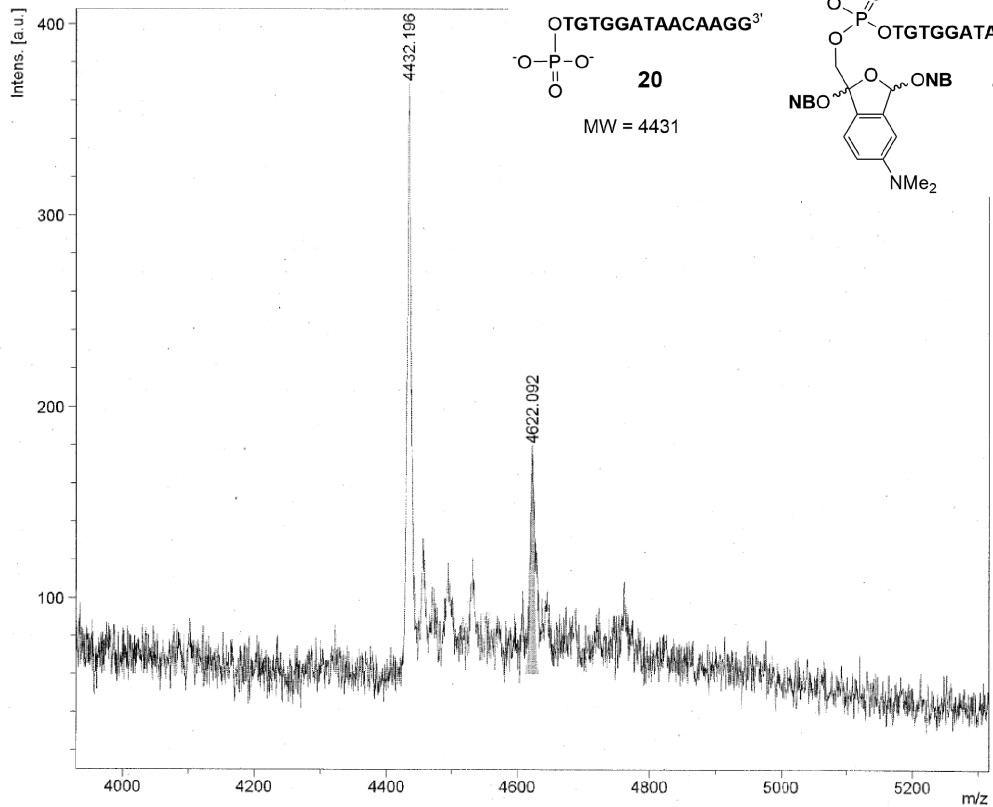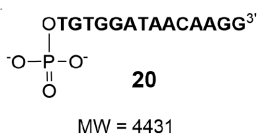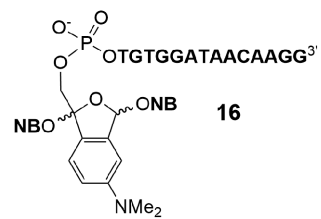

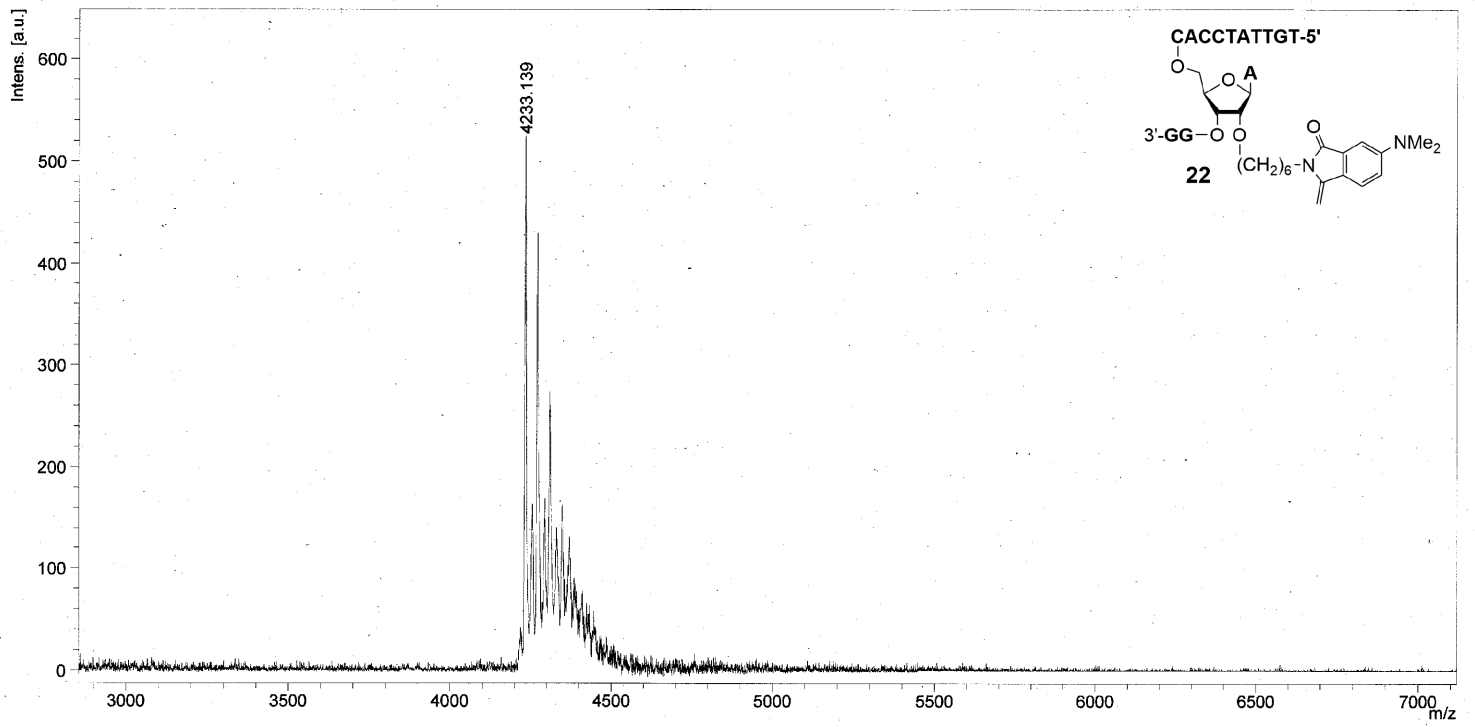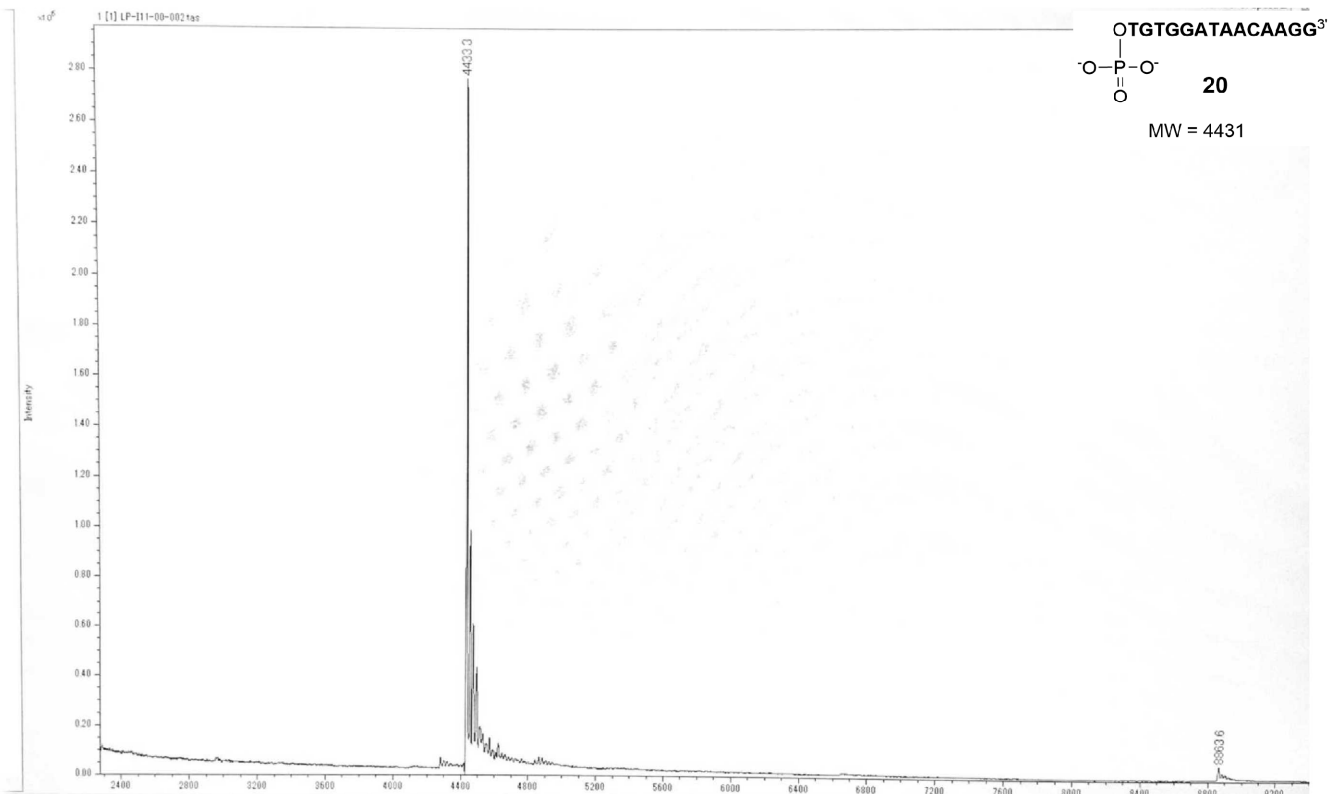



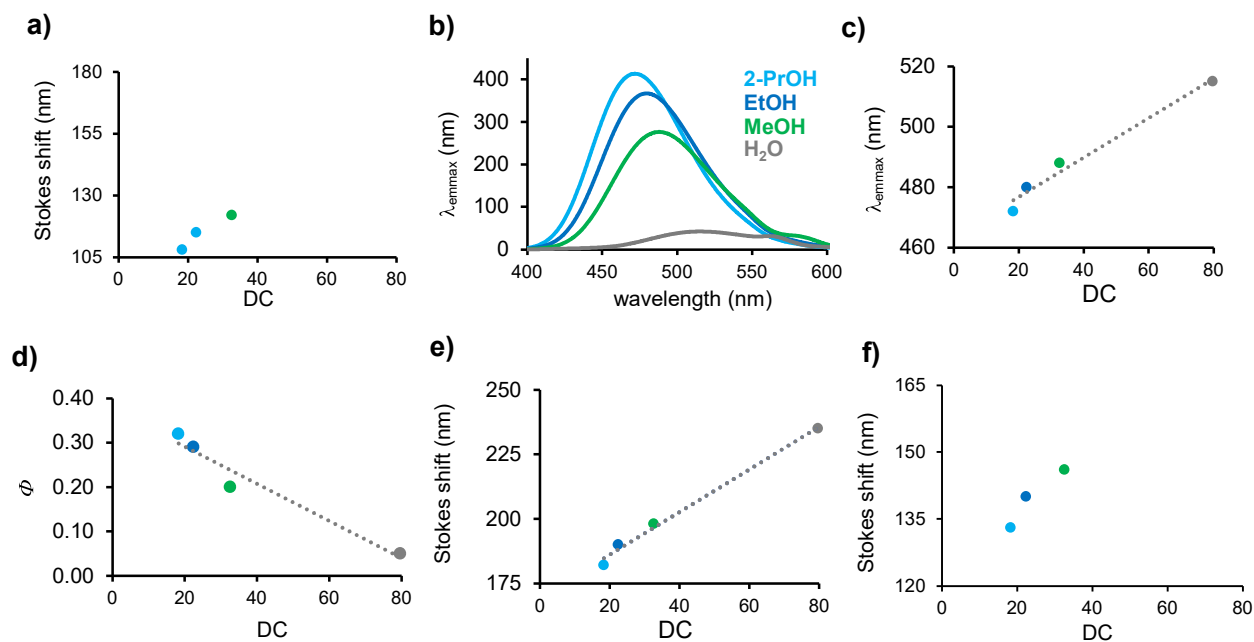

Fig. S1. Plots of data for **7** and **4b**. solvent; **2-PrOH**, **EtOH**, **MeOH**, and **H<sub>2</sub>O**.

a) Stokes shift versus solvent dielectric constant (DC), data of **7** (0.1 μM solution,

$\lambda_{\text{ex}} \cong 365$  nm, Table 1)

b) fluorescence spectra of **7** (0.1 μM solution,  $\lambda_{\text{ex}} = 280$  or 290 nm, Table 1)

c)  $\lambda_{\text{emmax}}$  versus DC, data of **7** (0.1 μM solution,  $\lambda_{\text{ex}} = 280$  or 290 nm, Table 1)

d) fluorescence quantum yield versus DC, data of **7** (0.1 μM solution,  $\lambda_{\text{ex}} = 280$  or 290 nm, Table 1)

e) Stokes shift versus DC, data of **7** (0.1 μM solution,  $\lambda_{\text{ex}} = 280$  or 290 nm, Table 1)

f) Stokes shift versus DC, data of **4b** (Table S2,  $\lambda_{\text{ex}} = 396$  nm)

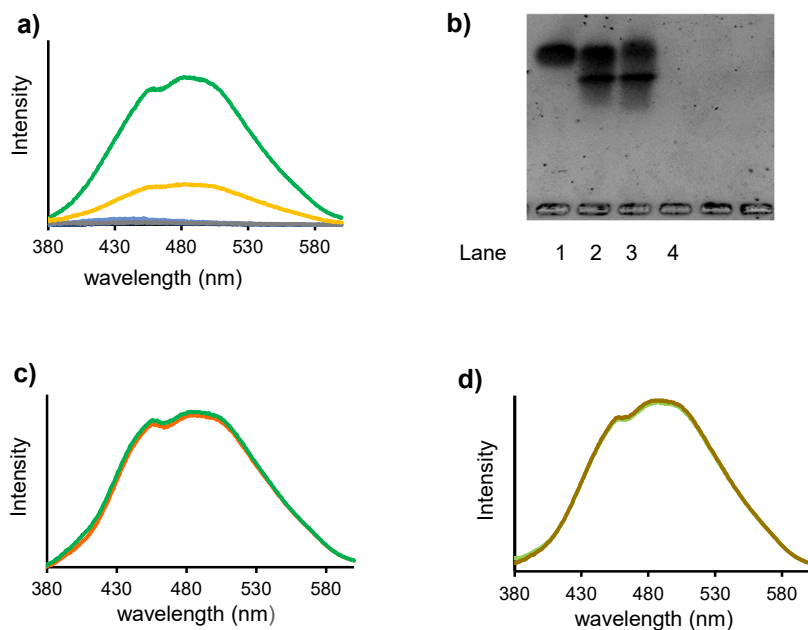

Fig. S2. a) Fluorescence spectra of the reaction of DIV-IV and reactive ODN (—), reactive ODN (—), unmodified ODN (—), and unmodified DIV-IV (—).  
 b) 1% Agarose electrophoresis;  
 lane 1. reactive ODN,  
 lane 2. reaction mixture for DIV modification,  
 lane 3. reaction mixture for DIV modification after addition of DNase,  
 lane 4. reaction mixture for DIV modification after addition of DNase and  $\text{CaCl}_2$   
 c) Fluorescence spectra of the reaction of DIV-IV and reactive ODN (—) and after addition of DNase and EDTA (—),  
 d) Fluorescence spectra of the reaction mixture (—) and after addition of  $\text{CaCl}_2$  (—).

Table S1. Photophysical data of **4** (R = -(CH<sub>2</sub>)<sub>10</sub>-CO<sub>2</sub>H) in protic solvents<sup>a)</sup>

| solvent<br>(dielectric constant, 20 °C <sup>a</sup> ) | Fluorescence<br>$\lambda_{\text{max}}/\text{nm}$ ( $\lambda_{\text{ex}}$ ) | $\Phi^b$<br>( $\lambda_{\text{ex}}$ ) |
|-------------------------------------------------------|----------------------------------------------------------------------------|---------------------------------------|
| 1-BuOH<br>(18.2)                                      | 527(410)                                                                   | 0.037                                 |
| 1-PrOH<br>(20.1)                                      | 530(410)                                                                   | 0.025                                 |
| EtOH<br>(22.4)                                        | 532 (410)                                                                  | 0.013                                 |
| MeOH<br>(32.6)                                        | 535 (410)                                                                  | 0.006                                 |
| H <sub>2</sub> O<br>(79.7)                            | 575 (410)                                                                  | 0.001                                 |

<sup>a)</sup> Saroja, G.; Ramachandram, B.; Saha, S.; Samanta, A., *J. Phys. Chem. B* **1999**, *103*, 2906.

Table S2. Photophysical data of **4** (R = -(CH<sub>2</sub>)<sub>6</sub>-OH) in protic solvents

| solvent<br>(dielectric constant <sup>a</sup> ) | UV-Vis absorption<br>$\lambda_{\text{max}}/\text{nm}$ ( $\lambda_{\text{og}} \epsilon$ ) | Fluorescence<br>$\lambda_{\text{max}}/\text{nm}$ ( $\lambda_{\text{ex}}$ ) | $\Phi^b$<br>( $\lambda_{\text{ex}}$ ) | Stokes shift<br>( $\lambda_{\text{ex}}$ ) | Brightness<br>$\Phi \times \epsilon$ |
|------------------------------------------------|------------------------------------------------------------------------------------------|----------------------------------------------------------------------------|---------------------------------------|-------------------------------------------|--------------------------------------|
| 2-PrOH<br>(18.3)                               | 268 (4.3)                                                                                | 527 (268)                                                                  | 0.031 (268)                           | 259 (268)                                 | 600                                  |
|                                                | 324 (3.9)                                                                                | 530 (324)                                                                  | 0.047 (324)                           | 206 (324)                                 | 360                                  |
|                                                | 396 (3.8)                                                                                | 529 (396)                                                                  | 0.044 (396)                           | 133 (396)                                 | 240                                  |
| EtOH<br>(22.4)                                 | 268 (4.3)                                                                                | 530 (268)                                                                  | 0.014 (268)                           | 262 (268)                                 | 260                                  |
|                                                | 324 (3.9)                                                                                | 536 (324)                                                                  | 0.020 (324)                           | 212 (324)                                 | 150                                  |
|                                                | 396 (3.7)                                                                                | 536 (396)                                                                  | 0.019 (396)                           | 140 (396)                                 | 100                                  |
| MeOH<br>(32.6)                                 | 268 (4.3)                                                                                | 527 (268)                                                                  | 0.006 (268)                           | 259 (268)                                 | 110                                  |
|                                                | 324 (3.9)                                                                                | 542 (324)                                                                  | 0.008 (324)                           | 218 (324)                                 | 60                                   |
|                                                | 396 (3.7)                                                                                | 542 (396)                                                                  | 0.007 (396)                           | 146 (396)                                 | 40                                   |
| H <sub>2</sub> O<br>(79.7)                     | 274 (4.3)                                                                                | 553 (274)                                                                  | 0.001 (274)                           | 279 (274)                                 | 10                                   |
|                                                | 327 (3.7)                                                                                | 512 (327)                                                                  | 0.002 (327)                           | 185 (327)                                 |                                      |

<sup>a</sup>20 °C, Handbook of organic solvents properties I. M. Smallwood, 1996 Arnold.

<sup>b</sup>Relative quantum yields were obtained from comparison with quinine
